# Supplementary material for: Identification of Target Genes of the bZIP Transcription Factor OsTGAP1, Whose Overexpression Causes Elicitor-Induced Hyperaccumulation of Diterpenoid Phytoalexins in Rice Cells
Source: PLOS journal article supplement (doi:10.1371/journal.pone.0105823), 2014-08-26
Supplement: S2 (10.1371/journal.pone.0105823.s002) [file journal.pone.0105823.s002]

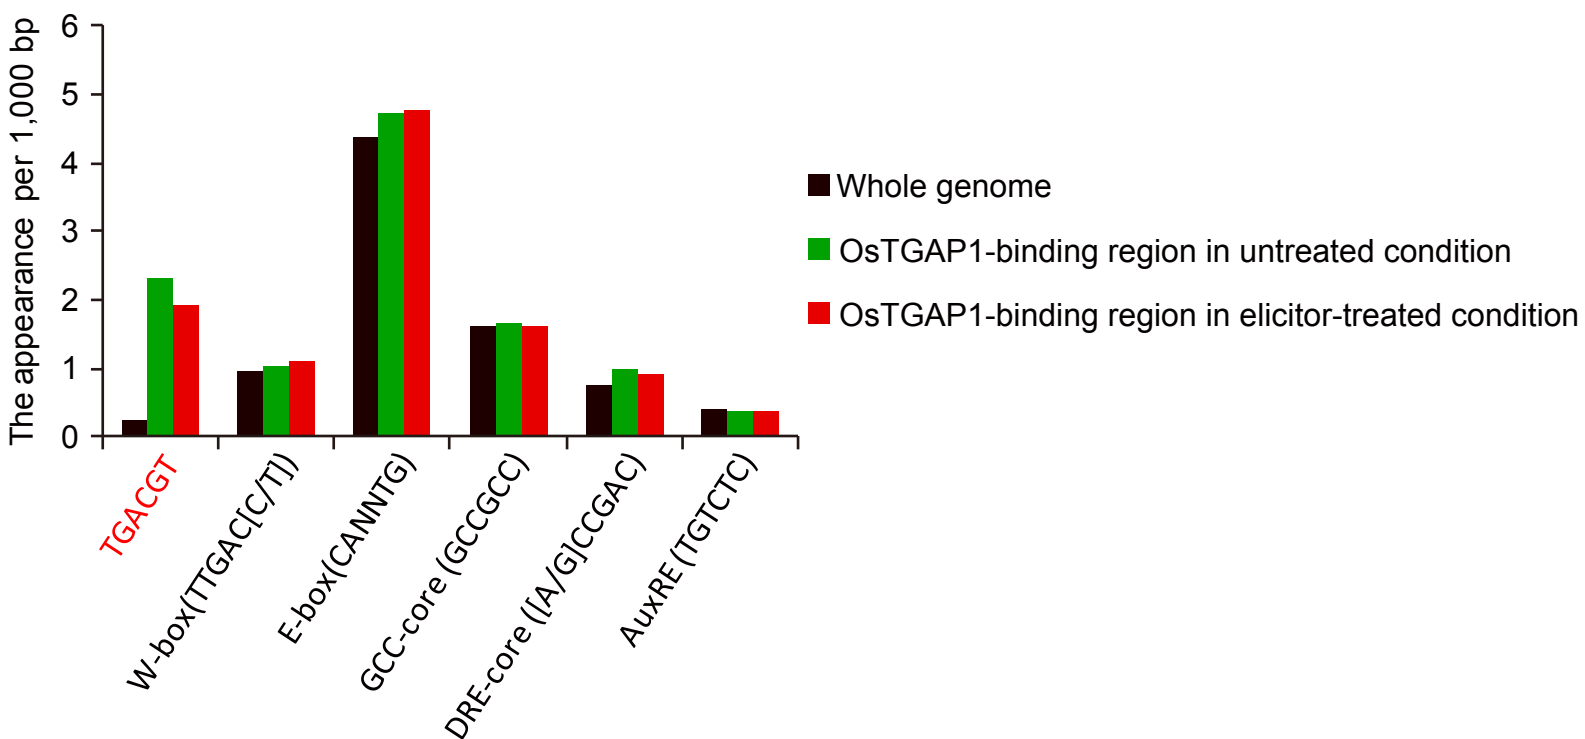

**Fig. S2.** The enrichment of each motif in OsTGAP1-binding regions. Y-axis represents the appearance of each motif in the whole genome sequence or OsTGAP1-binding regions.
