# Supplementary material for: Identification of Target Genes of the bZIP Transcription Factor OsTGAP1, Whose Overexpression Causes Elicitor-Induced Hyperaccumulation of Diterpenoid Phytoalexins in Rice Cells
Source: PLoS One. 2014 Aug 26;9(8):e105823. doi: 10.1371/journal.pone.0105823 (PMC4144896; doi:10.1371/journal.pone.0105823)
Supplement: Table S3 — List of OsTGAP1-binding regions in untreated condition. (XLSX) [file pone.0105823.s009.xlsx]

## Sheet: Table S3
Table S3. List of OsTGAP1-binding regions in untreated condition.
Chr No.	Start	End	Length (bp)	OsTGAP1 binding in elicitor-treated condition	Number of TGACGT sequence in each region
1	100710	101029	320	Yes	2
1	106874	107161	288	Yes	2
1	115342	115629	288	Yes	2
1	133197	133462	266	Yes	2
1	172881	173116	236	Yes	1
1	449265	449519	255	Yes	1
1	452421	452761	341	Yes	1
1	494712	495015	304	Yes	1
1	612960	613082	123	No	0
1	657573	657951	379	Yes	1
1	796943	797194	252	Yes	1
1	847147	847312	166	No	1
1	1072632	1072813	182	No	2
1	1115897	1116151	255	Yes	1
1	1126301	1126598	298	Yes	2
1	1577068	1577369	302	Yes	0
1	1676169	1676375	207	Yes	1
1	1686886	1687196	311	Yes	1
1	1688940	1689268	329	Yes	2
1	1748908	1749152	245	Yes	2
1	1799971	1800333	363	No	2
1	1838964	1839131	168	No	0
1	1866644	1866898	255	Yes	1
1	1975114	1975379	266	Yes	1
1	2052142	2052473	332	Yes	1
1	2057884	2058176	293	Yes	1
1	2077324	2077559	236	Yes	2
1	2107463	2107745	283	No	3
1	2178679	2178969	291	Yes	1
1	2447063	2447238	176	No	0
1	2485056	2485368	313	Yes	2
1	2539909	2540477	569	Yes	4
1	2548077	2548284	208	Yes	2
1	2548992	2549108	117	Yes	2
1	2622186	2622433	248	Yes	2
1	2631415	2631589	175	Yes	2
1	2837840	2838021	182	No	1
1	2844191	2844505	315	Yes	3
1	2857125	2857368	244	Yes	2
1	2870852	2871122	271	Yes	2
1	2917839	2918324	486	Yes	3
1	3113540	3113895	356	Yes	2
1	3140405	3140558	154	Yes	0
1	3372927	3373047	121	Yes	1
1	3428856	3429154	299	Yes	2
1	3430226	3430472	247	Yes	1
1	3491324	3491483	160	No	2
1	3516535	3516864	330	Yes	2
1	3786009	3786187	179	Yes	0
1	3787441	3787649	209	Yes	1
1	3788954	3789288	335	Yes	0
1	3899235	3899472	238	Yes	1
1	3915279	3915596	318	Yes	1
1	3916826	3917056	231	Yes	1
1	4153627	4153877	251	No	1
1	4157663	4157860	198	No	1
1	4337680	4337867	188	No	0
1	4339585	4339951	367	Yes	2
1	4393783	4393952	170	No	2
1	4413940	4414267	328	Yes	1
1	4441109	4441353	245	No	3
1	4456860	4457084	225	Yes	1
1	4528399	4528714	316	Yes	3
1	4529336	4529460	125	Yes	0
1	4612671	4612818	148	No	2
1	4635912	4636222	311	Yes	1
1	4645032	4645429	398	Yes	3
1	4721843	4721973	131	No	1
1	4724763	4724873	111	No	1
1	4824230	4824567	338	Yes	2
1	4873065	4873347	283	Yes	0
1	4912742	4912974	233	Yes	1
1	4953292	4953472	181	No	0
1	4964750	4964960	211	No	0
1	4980975	4981085	111	No	0
1	5084593	5084846	254	Yes	2
1	5135314	5135531	218	No	1
1	5203117	5203427	311	No	1
1	5270905	5271189	285	No	3
1	5285958	5286249	292	Yes	2
1	5373750	5374045	296	No	1
1	5500780	5501069	290	Yes	0
1	5631438	5631652	215	Yes	0
1	5833899	5834193	295	Yes	0
1	5953422	5953641	220	No	2
1	6301736	6302009	274	No	3
1	6468643	6468920	278	Yes	0
1	6470116	6470285	170	No	1
1	6602629	6602889	261	Yes	2
1	6644492	6644650	159	No	2
1	7034630	7034837	208	No	1
1	7108122	7108414	293	Yes	0
1	7240969	7241198	230	Yes	1
1	7280700	7281001	302	Yes	1
1	7501557	7501800	244	Yes	1
1	7501822	7501922	101	Yes	1
1	7533034	7533351	318	Yes	2
1	7815922	7816394	473	Yes	0
1	8664531	8664806	276	No	2
1	8952403	8952750	348	Yes	2
1	9389350	9389636	287	No	2
1	9525856	9526185	330	No	2
1	9638036	9638360	325	Yes	1
1	9768734	9768986	253	No	1
1	9778107	9778382	276	No	2
1	10518118	10518485	368	Yes	2
1	10668995	10669307	313	Yes	2
1	10774686	10774885	200	No	0
1	11032460	11032761	302	No	2
1	11237239	11237471	233	No	1
1	11285433	11285662	230	No	2
1	11902197	11902518	322	No	2
1	12005883	12006170	288	No	3
1	13067583	13067855	273	No	3
1	13681667	13681950	284	No	0
1	13711933	13712441	509	No	4
1	14228201	14228467	267	No	2
1	14383769	14384110	342	No	2
1	14523620	14523918	299	No	1
1	14978689	14978978	290	No	2
1	15610124	15610315	192	No	2
1	15730973	15731233	261	No	3
1	16112774	16113087	314	No	3
1	16277882	16278224	343	No	2
1	16498222	16498482	261	No	2
1	18808167	18808465	299	No	0
1	19427207	19427527	321	Yes	0
1	19667874	19668127	254	No	0
1	19794171	19794511	341	Yes	0
1	20220003	20220280	278	No	3
1	21457464	21457905	442	Yes	0
1	22338570	22338889	320	Yes	0
1	23077782	23078164	383	Yes	0
1	23261465	23261852	388	Yes	0
1	23961877	23962259	383	Yes	0
1	29061706	29062066	361	Yes	0
1	30167042	30167393	352	Yes	1
1	30372498	30372835	338	No	0
1	30550547	30550912	366	Yes	0
1	30668845	30669150	306	No	0
1	30984734	30985073	340	No	0
1	30989941	30990245	305	No	0
1	30992871	30993228	358	Yes	0
1	31306799	31307140	342	No	0
1	32914897	32915285	389	Yes	0
1	33107471	33107804	334	No	0
1	33298949	33299296	348	Yes	0
1	33817171	33817484	314	No	0
1	34092100	34092437	338	No	0
1	34946623	34946962	340	No	0
1	35346701	35347012	312	No	0
1	35762561	35762888	328	Yes	0
1	35765396	35765756	361	Yes	0
1	36083582	36083895	314	Yes	0
1	36719594	36719880	287	No	0
1	36759640	36759994	355	Yes	0
1	36763373	36763713	341	No	0
1	36825344	36825664	321	Yes	0
1	37206679	37207047	369	Yes	0
1	37507182	37507538	357	Yes	1
1	37824159	37824475	317	Yes	0
1	37879294	37879528	235	No	0
1	38689351	38689679	329	Yes	0
1	39004816	39005165	350	Yes	0
1	39088785	39089041	257	No	0
1	39444587	39444916	330	Yes	0
1	39540354	39540592	239	No	0
1	39666203	39666563	361	Yes	0
1	39872325	39872614	290	Yes	0
1	40091773	40092060	288	Yes	0
1	40093548	40093793	246	No	0
1	40131170	40131542	373	Yes	1
1	40217070	40217320	251	Yes	0
1	40367814	40368128	315	Yes	0
1	40651887	40652177	291	Yes	0
1	40664706	40665012	307	Yes	0
1	40808087	40808347	261	Yes	0
1	40840205	40840423	219	No	0
1	41068172	41068363	192	Yes	0
1	41162478	41162737	260	Yes	0
1	41270647	41270975	329	Yes	0
1	41422487	41422743	257	Yes	0
1	41457154	41457533	380	Yes	0
1	41605507	41605692	186	Yes	0
1	41660038	41660243	206	Yes	0
1	41717103	41717286	184	No	0
1	41728753	41728952	200	Yes	0
1	41756139	41756391	253	Yes	0
1	41796490	41796862	373	Yes	0
1	41806679	41806950	272	Yes	0
1	41921210	41921517	308	Yes	0
1	42010933	42011134	202	Yes	0
1	42093788	42094105	318	Yes	0
1	42139677	42139905	229	Yes	0
1	42165976	42166108	133	Yes	1
1	42323580	42323765	186	Yes	0
1	42393168	42393255	88	No	0
1	42439747	42439756	10	No	0
1	42560887	42561125	239	No	0
1	42567794	42568101	308	Yes	0
1	42591221	42591445	225	Yes	0
1	42601356	42601543	188	Yes	0
1	42617937	42618085	149	No	0
1	42674211	42674437	227	Yes	0
1	42828273	42828590	318	Yes	0
1	43110904	43111250	347	Yes	0
1	43320148	43320379	232	Yes	0
1	43332191	43332530	340	Yes	1
1	43467621	43467986	366	Yes	0
1	43496040	43496219	180	Yes	0
1	43574221	43574561	341	Yes	0
1	43610034	43610383	350	Yes	1
1	43716820	43717139	320	Yes	1
1	43782236	43782362	127	Yes	0
1	43787213	43787364	152	Yes	0
1	43793758	43794288	531	Yes	0
1	43800038	43800160	123	No	1
1	43838466	43838595	130	Yes	0
1	43853887	43854193	307	Yes	0
1	43891145	43891417	273	Yes	0
1	44086530	44086733	204	Yes	0
1	44159775	44160322	548	Yes	0
1	44327301	44327459	159	No	1
1	44495765	44495917	153	No	0
1	44525903	44526124	222	Yes	0
1	44527414	44527697	284	Yes	0
1	44597814	44598065	252	Yes	0
1	44702499	44702758	260	Yes	0
1	44845297	44845550	254	Yes	0
1	44853417	44853781	365	Yes	0
1	44869652	44869795	144	No	0
1	44875167	44875423	257	Yes	0
2	187359	187527	169	No	1
2	216487	216784	298	Yes	2
2	224352	224705	354	Yes	2
2	418876	419156	281	Yes	2
2	485321	485485	165	Yes	0
2	890054	890238	185	Yes	0
2	943898	944236	339	Yes	0
2	1015925	1016271	347	Yes	0
2	1024810	1025103	294	Yes	1
2	1067023	1067151	129	Yes	2
2	1104522	1104686	165	No	0
2	1134361	1134700	340	Yes	1
2	1186388	1186579	192	Yes	1
2	1206414	1206610	197	Yes	1
2	1276650	1276844	195	Yes	2
2	1344456	1344674	219	Yes	1
2	1446835	1447182	348	Yes	3
2	1480585	1480870	286	Yes	1
2	1613031	1613152	122	Yes	1
2	1615720	1616027	308	Yes	0
2	1729846	1729940	95	Yes	0
2	1838653	1838966	314	Yes	2
2	2017442	2017751	310	No	3
2	2095931	2096242	312	Yes	2
2	2124956	2125260	305	Yes	1
2	2146305	2146605	301	Yes	2
2	2294342	2294696	355	Yes	4
2	2605387	2605681	295	Yes	2
2	2698636	2698823	188	Yes	0
2	2750460	2750711	252	Yes	1
2	2791843	2791963	121	No	0
2	2862334	2862505	172	Yes	1
2	2919170	2919368	199	Yes	2
2	3343574	3343832	259	Yes	1
2	3500114	3500274	161	Yes	1
2	3544091	3544328	238	Yes	2
2	3545930	3546061	132	Yes	0
2	3553102	3553403	302	Yes	0
2	3577353	3577645	293	Yes	1
2	3610402	3610643	242	No	1
2	3637490	3637845	356	Yes	2
2	3658917	3659183	267	Yes	2
2	3959863	3960152	290	Yes	1
2	3973653	3973908	256	Yes	1
2	4005620	4005989	370	Yes	2
2	4024500	4024772	273	Yes	0
2	4109495	4109742	248	Yes	1
2	4176129	4176426	298	Yes	2
2	4179465	4179758	294	Yes	3
2	4278578	4278863	286	Yes	4
2	4300312	4300656	345	Yes	2
2	4312109	4312398	290	Yes	1
2	4558232	4558476	245	Yes	0
2	4618019	4618317	299	Yes	1
2	4875985	4876319	335	Yes	4
2	4888567	4888753	187	No	2
2	4890217	4890436	220	No	2
2	4999705	5000024	320	Yes	0
2	5092754	5093025	272	Yes	2
2	5154469	5154678	210	Yes	2
2	5162067	5162421	355	Yes	1
2	5208983	5209255	273	No	0
2	5279983	5280310	328	Yes	3
2	5357127	5357437	311	Yes	1
2	5380087	5380376	290	Yes	2
2	5651852	5652045	194	Yes	0
2	5662243	5662573	331	Yes	2
2	5703605	5703790	186	Yes	1
2	5749521	5749805	285	Yes	3
2	5780210	5780394	185	Yes	0
2	5784490	5784710	221	No	1
2	5834575	5834764	190	No	0
2	5899523	5899642	120	No	0
2	6025445	6025766	322	Yes	2
2	6175704	6176091	388	Yes	1
2	6242513	6242613	101	No	0
2	6458785	6458939	155	No	2
2	6458946	6459047	102	No	1
2	6525706	6525952	247	Yes	1
2	6526961	6527261	301	Yes	1
2	6553752	6553957	206	Yes	2
2	6654181	6654369	189	Yes	1
2	6705555	6705873	319	Yes	0
2	6713466	6713821	356	Yes	2
2	6723411	6723616	206	No	3
2	6756216	6756449	234	No	1
2	6775447	6775769	323	Yes	2
2	7007978	7008289	312	Yes	1
2	7166996	7167267	272	Yes	1
2	7373288	7373578	291	Yes	1
2	7374363	7374465	103	No	1
2	7384549	7384664	116	No	0
2	7390614	7390922	309	Yes	2
2	7401036	7401180	145	No	0
2	7495276	7495555	280	Yes	1
2	7519983	7520302	320	Yes	0
2	7555229	7555335	107	No	0
2	7623788	7623975	188	Yes	0
2	7639533	7639658	126	No	0
2	8020475	8020840	366	Yes	1
2	8198559	8198820	262	Yes	1
2	8388559	8388822	264	No	0
2	8519039	8519376	338	Yes	2
2	8768807	8769188	382	Yes	3
2	8848161	8848363	203	No	1
2	8853827	8854030	204	No	1
2	8878599	8878840	242	No	2
2	8966156	8966493	338	Yes	2
2	9020257	9020587	331	Yes	3
2	9144979	9145120	142	Yes	1
2	9207117	9207252	136	No	0
2	9286878	9287035	158	No	2
2	9469283	9469554	272	Yes	1
2	9502054	9502232	179	No	1
2	9854551	9854875	325	Yes	5
2	10041653	10041795	143	No	1
2	10113143	10113340	198	Yes	1
2	10221196	10221480	285	No	1
2	10685554	10685970	417	Yes	3
2	10796416	10796601	186	No	1
2	10816739	10817030	292	No	4
2	11098513	11098766	254	Yes	0
2	11158435	11158538	104	No	0
2	11263665	11263803	139	No	2
2	11547871	11548107	237	Yes	2
2	11579366	11579544	179	No	1
2	11613697	11614013	317	Yes	0
2	11632377	11632520	144	No	1
2	12216155	12216479	325	No	0
2	12227277	12227450	174	No	1
2	12433020	12433345	326	Yes	2
2	12442682	12442868	187	No	1
2	12488756	12488957	202	No	1
2	12668780	12669157	378	Yes	1
2	12673118	12673281	164	No	2
2	12764149	12764266	118	Yes	0
2	13051394	13051561	168	No	1
2	13080941	13081224	284	No	4
2	13301301	13301592	292	No	4
2	13346853	13347084	232	Yes	1
2	14558426	14558750	325	No	0
2	14629891	14629995	105	No	0
2	14630017	14630046	30	No	0
2	14643147	14643417	271	No	0
2	14755450	14755787	338	No	0
2	14894916	14895107	192	No	0
2	14948492	14948817	326	No	0
2	15005896	15006068	173	No	0
2	15036842	15037015	174	No	0
2	15363753	15364018	266	No	0
2	15589354	15589649	296	No	0
2	16170270	16170606	337	Yes	0
2	16294350	16294440	91	No	0
2	16444881	16445212	332	Yes	0
2	16474684	16474917	234	No	1
2	16631502	16631747	246	No	0
2	16930345	16930597	253	No	0
2	17007104	17007214	111	No	0
2	17095259	17095627	369	No	0
2	17424733	17425064	332	Yes	0
2	17425904	17426257	354	Yes	0
2	17431814	17432106	293	Yes	0
2	17449845	17450176	332	Yes	0
2	17451577	17451798	222	Yes	0
2	17497462	17497690	229	No	0
2	17837984	17838296	313	No	0
2	17876312	17876444	133	No	0
2	18024918	18025018	101	No	0
2	18086680	18086893	214	No	0
2	18150136	18150398	263	No	0
2	18617418	18617609	192	No	0
2	18786906	18787177	272	Yes	0
2	18983830	18984048	219	Yes	0
2	19022113	19022212	100	No	0
2	19075473	19075725	253	No	0
2	19118796	19118939	144	No	0
2	19140147	19140316	170	No	0
2	19142672	19142947	276	No	0
2	19143365	19143531	167	Yes	0
2	19154154	19154426	273	No	0
2	19168519	19168848	330	Yes	0
2	19403427	19403578	152	No	0
2	19471827	19472057	231	No	0
2	19748864	19749170	307	No	0
2	19811185	19811438	254	Yes	0
2	19932492	19932814	323	Yes	0
2	19949000	19949217	218	No	0
2	20026090	20026343	254	No	0
2	20060112	20060207	96	No	0
2	20140078	20140397	320	Yes	0
2	20248401	20248765	365	No	0
2	20311423	20311650	228	Yes	0
2	20422765	20422979	215	No	0
2	20529719	20529863	145	No	0
2	20624253	20624521	269	No	0
2	20787475	20787581	107	No	0
2	20799937	20800307	371	Yes	1
2	20907354	20907605	252	Yes	0
2	21300004	21300194	191	No	0
2	21550332	21550453	122	No	0
2	21550463	21550563	101	No	0
2	21835650	21835989	340	Yes	1
2	21838284	21838577	294	No	0
2	21923263	21923499	237	Yes	0
2	22058154	22058326	173	No	0
2	22177658	22177758	101	No	0
2	22307957	22308157	201	No	0
2	22344147	22344330	184	No	0
2	22345550	22345706	157	No	0
2	22469812	22470140	329	No	0
2	22501601	22501716	116	No	0
2	22531721	22532061	341	No	0
2	22536911	22537245	335	No	0
2	22545574	22545704	131	Yes	0
2	22657659	22657955	297	No	0
2	22690574	22690735	162	No	0
2	22755945	22756156	212	Yes	0
2	22776208	22776484	277	Yes	0
2	22779709	22779824	116	No	0
2	22794569	22794734	166	No	0
2	22868350	22868618	269	No	0
2	22873996	22874188	193	No	0
2	22892589	22892903	315	Yes	0
2	22914876	22915049	174	No	0
2	23037540	23037737	198	No	0
2	23038829	23039106	278	No	0
2	23077128	23077257	130	No	0
2	23105430	23105545	116	No	0
2	23205605	23205867	263	No	0
2	23296993	23297100	108	No	0
2	23324799	23325034	236	No	0
2	23381793	23382114	322	No	0
2	23449244	23449406	163	No	1
2	23462892	23463021	130	No	0
2	23556022	23556297	276	No	0
2	23878984	23879097	114	No	1
2	23958242	23958519	278	No	0
2	24013519	24013619	101	No	0
2	24275159	24275444	286	No	0
2	24386728	24386923	196	Yes	0
2	24420224	24420573	350	Yes	0
2	24472860	24473183	324	Yes	0
2	24660460	24660569	110	No	0
2	24911683	24912015	333	Yes	0
2	25113733	25113927	195	Yes	0
2	25395166	25395313	148	No	0
2	25492242	25492342	101	No	0
2	25493872	25494067	196	Yes	0
2	25752645	25752888	244	No	1
2	25784916	25785208	293	Yes	0
2	26041787	26041919	133	No	0
2	26394178	26394464	287	Yes	0
2	26471535	26471638	104	No	0
2	26690707	26690913	207	No	0
2	26858609	26858740	132	No	0
2	26869915	26870041	127	No	0
2	26925800	26926105	306	Yes	0
2	26946547	26946686	140	No	0
2	26978187	26978469	283	Yes	0
2	27325292	27325463	172	No	0
2	27343192	27343511	320	Yes	0
2	27356038	27356323	286	Yes	0
2	27404843	27404943	101	No	0
2	27516808	27517045	238	Yes	0
2	27783253	27783501	249	Yes	0
2	27951456	27951756	301	No	0
2	28125309	28125416	108	No	0
2	28137940	28138082	143	No	0
2	28481934	28482145	212	No	0
2	28611813	28611921	109	No	0
2	28611927	28611998	72	No	0
2	28703894	28704058	165	No	0
2	28709602	28709900	299	Yes	0
2	29026301	29026476	176	Yes	0
2	29129052	29129154	103	No	0
2	29323315	29323568	254	Yes	0
2	29378491	29378601	111	No	0
2	29414103	29414377	275	No	0
2	29828147	29828429	283	Yes	0
2	29856359	29856499	141	No	0
2	29897994	29898289	296	Yes	0
2	29906474	29906760	287	Yes	1
2	29932980	29933196	217	Yes	0
2	29933250	29933549	300	Yes	0
2	29968771	29969144	374	Yes	0
2	30123147	30123395	249	Yes	0
2	30139854	30140104	251	Yes	0
2	30246713	30246884	172	Yes	0
2	30257457	30257589	133	No	0
2	30307576	30307732	157	No	0
2	30371908	30372033	126	Yes	0
2	30646689	30646952	264	Yes	0
2	30957537	30957888	352	Yes	0
2	31050075	31050211	137	No	0
2	31177407	31177598	192	Yes	0
2	31305569	31305765	197	Yes	0
2	31394808	31395118	311	No	0
2	31419890	31420123	234	No	0
2	31486144	31486308	165	No	0
2	31606126	31606414	289	Yes	0
2	31688925	31689082	158	No	0
2	31772769	31773142	374	Yes	0
2	31899714	31899827	114	Yes	0
2	31919522	31919862	341	Yes	0
2	32066064	32066231	168	Yes	0
2	32070835	32070935	101	No	0
2	32101941	32102087	147	No	0
2	32128722	32128970	249	No	0
2	32220727	32221061	335	Yes	0
2	32293982	32294240	259	Yes	0
2	32550399	32550660	262	Yes	0
2	32610479	32610625	147	No	0
2	32653132	32653320	189	Yes	0
2	32703508	32703608	101	No	0
2	32804303	32804405	103	Yes	0
2	32828039	32828402	364	Yes	0
2	33016288	33016416	129	Yes	0
2	33127430	33127656	227	No	0
2	33129613	33129909	297	Yes	0
2	33193361	33193571	211	Yes	0
2	33252131	33252381	251	Yes	0
2	33314253	33314480	228	Yes	0
2	33324627	33324931	305	Yes	0
2	33373169	33373425	257	Yes	0
2	33429718	33430027	310	Yes	0
2	33436794	33436932	139	Yes	0
2	33538360	33538732	373	Yes	0
2	33539664	33540018	355	Yes	0
2	33693450	33693669	220	Yes	0
2	33784823	33784908	86	No	0
2	33789699	33789984	286	Yes	0
2	33852440	33852734	295	Yes	0
2	33853791	33853919	129	Yes	0
2	33964403	33964517	115	Yes	0
2	34033146	34033325	180	Yes	2
2	34308760	34309027	268	Yes	0
2	34585403	34585625	223	Yes	0
2	34684915	34685160	246	Yes	1
2	34910876	34911109	234	Yes	0
2	34913999	34914157	159	Yes	0
2	35065722	35065922	201	Yes	0
2	35119674	35119942	269	Yes	0
2	35267358	35267554	197	No	0
2	35330112	35330455	344	Yes	0
2	35565387	35565573	187	Yes	0
2	35619592	35619899	308	Yes	0
2	35650163	35650279	117	Yes	0
2	35688819	35688959	141	No	0
2	35941697	35942081	385	Yes	0
2	36042435	36042751	317	Yes	0
2	36083496	36083705	210	No	0
2	36104554	36104853	300	Yes	0
2	36227378	36227529	152	Yes	0
2	36440756	36440881	126	Yes	0
2	36443739	36444014	276	Yes	0
2	36519439	36519734	296	Yes	0
3	22967	23301	335	Yes	0
3	124056	124287	232	Yes	0
3	475951	476157	207	Yes	0
3	709422	709709	288	Yes	0
3	798841	798957	117	No	0
3	899256	899525	270	Yes	0
3	956792	957140	349	Yes	0
3	993708	994002	295	Yes	0
3	1030654	1030901	248	Yes	0
3	1047581	1047903	323	Yes	0
3	1079479	1079703	225	Yes	0
3	1134169	1134472	304	Yes	0
3	1165471	1165603	133	No	0
3	1243941	1244074	134	Yes	0
3	1255373	1255476	104	No	0
3	1351117	1351319	203	Yes	0
3	1354284	1354527	244	Yes	0
3	1512195	1512533	339	Yes	0
3	1646305	1646633	329	Yes	0
3	1665747	1666023	277	Yes	0
3	1729742	1730068	327	Yes	0
3	1742599	1742770	172	Yes	0
3	1769306	1769582	277	Yes	0
3	1770540	1771010	471	Yes	0
3	1834358	1834568	211	Yes	0
3	1871087	1871322	236	Yes	0
3	2115834	2116199	366	Yes	0
3	2117638	2117823	186	No	0
3	2212450	2212567	118	No	0
3	2224579	2224902	324	Yes	0
3	2250292	2250452	161	Yes	0
3	2482584	2482733	150	Yes	0
3	2525145	2525302	158	Yes	0
3	2566628	2566845	218	Yes	0
3	2669470	2669817	348	Yes	0
3	2768028	2768378	351	Yes	0
3	2867313	2867627	315	Yes	0
3	2867993	2868090	98	Yes	1
3	2960529	2960811	283	Yes	0
3	2970068	2970367	300	Yes	0
3	2992459	2992559	101	Yes	0
3	3109061	3109374	314	Yes	0
3	3112153	3112483	331	No	0
3	3132358	3132550	193	Yes	0
3	3185071	3185395	325	Yes	0
3	3486343	3486578	236	Yes	0
3	3565517	3565696	180	Yes	1
3	3923769	3923998	230	Yes	0
3	4010813	4011137	325	No	0
3	4067001	4067355	355	Yes	0
3	4139119	4139289	171	Yes	0
3	4164451	4164709	259	Yes	0
3	4199818	4200116	299	Yes	0
3	4271278	4271569	292	No	0
3	4317642	4317780	139	Yes	0
3	4349492	4349751	260	Yes	0
3	4353976	4354111	136	No	0
3	4544126	4544270	145	No	0
3	4591256	4591524	269	Yes	0
3	4656365	4656610	246	Yes	1
3	4668141	4668404	264	Yes	0
3	4833898	4834054	157	Yes	0
3	4843914	4844078	165	Yes	0
3	4950134	4950293	160	Yes	0
3	5087532	5087688	157	No	1
3	5114452	5114775	324	Yes	0
3	5191213	5191496	284	Yes	0
3	5247162	5247343	182	No	0
3	5306245	5306453	209	Yes	0
3	5307517	5307685	169	No	0
3	5369087	5369236	150	No	0
3	5477890	5478011	122	No	0
3	5524427	5524616	190	Yes	0
3	5526097	5526245	149	Yes	0
3	6015010	6015249	240	No	1
3	6039844	6040143	300	Yes	0
3	6386076	6386342	267	Yes	0
3	6418698	6418968	271	Yes	0
3	6491733	6492000	268	Yes	0
3	6526896	6527252	357	Yes	0
3	6578646	6578979	334	Yes	0
3	6584845	6585106	262	Yes	0
3	6600965	6601218	254	No	0
3	6660685	6660914	230	Yes	0
3	6778831	6778994	164	Yes	0
3	6801943	6802293	351	Yes	0
3	7020310	7020483	174	No	0
3	7070440	7070729	290	Yes	0
3	7226736	7226990	255	No	0
3	7650899	7651039	141	No	0
3	7656350	7656573	224	Yes	0
3	7658142	7658346	205	Yes	0
3	7741090	7741221	132	No	0
3	7785212	7785412	201	Yes	0
3	8157849	8158027	179	No	0
3	8294697	8295012	316	No	0
3	8434292	8434531	240	Yes	0
3	8491315	8491448	134	No	0
3	8687184	8687422	239	No	0
3	8907653	8907778	126	No	0
3	9127330	9127467	138	No	0
3	9132245	9132441	197	No	0
3	9165253	9165606	354	Yes	0
3	9302430	9302745	316	Yes	0
3	9311030	9311234	205	No	0
3	9329453	9329633	181	No	0
3	9371131	9371514	384	Yes	0
3	9373583	9373752	170	No	0
3	9482685	9483015	331	Yes	0
3	9494064	9494253	190	No	0
3	9690281	9690645	365	Yes	0
3	9705677	9705821	145	No	0
3	9762853	9763120	268	Yes	0
3	9768145	9768257	113	No	0
3	9876766	9877056	291	No	0
3	9877617	9877942	326	Yes	0
3	9879700	9879940	241	Yes	0
3	9899669	9899943	275	Yes	0
3	9934319	9934534	216	No	0
3	9955170	9955295	126	Yes	0
3	10014595	10014737	143	No	0
3	10252164	10252478	315	No	0
3	10420638	10420832	195	No	0
3	10532065	10532352	288	Yes	0
3	10630585	10630896	312	Yes	0
3	10651619	10651905	287	Yes	0
3	10695461	10695728	268	Yes	0
3	10819654	10819754	101	No	0
3	10862176	10862295	120	Yes	0
3	10877482	10877748	267	No	0
3	11141009	11141369	361	Yes	0
3	11217661	11217935	275	Yes	0
3	11258368	11258540	173	No	0
3	11310360	11310651	292	No	0
3	11356879	11357013	135	No	0
3	11555253	11555481	229	No	0
3	11690078	11690363	286	Yes	0
3	11984262	11984542	281	Yes	1
3	12032056	12032295	240	Yes	0
3	12039412	12039555	144	No	0
3	12077629	12077940	312	Yes	0
3	12094364	12094617	254	No	0
3	12217188	12217348	161	No	0
3	12377245	12377420	176	No	0
3	12442121	12442468	348	Yes	1
3	12536104	12536370	267	No	0
3	12643784	12643997	214	No	0
3	12694788	12695139	352	Yes	0
3	12737055	12737143	89	No	0
3	12968058	12968193	136	Yes	0
3	13198872	13199202	331	No	0
3	13205250	13205593	344	Yes	0
3	13209874	13210138	265	No	0
3	13280203	13280525	323	No	0
3	13407713	13408064	352	No	0
3	13416658	13416966	309	No	0
3	13435760	13436019	260	No	0
3	14013014	14013377	364	No	0
3	14019453	14019702	250	No	1
3	14024325	14024615	291	No	0
3	14031194	14031472	279	No	0
3	14051494	14051789	296	No	0
3	14151331	14151648	318	No	0
3	14783422	14783751	330	Yes	0
3	15104764	15105117	354	No	0
3	15121730	15122076	347	No	0
3	15590268	15590570	303	Yes	0
3	15709155	15709424	270	No	1
3	16789698	16789966	269	No	0
3	17218066	17218391	326	Yes	0
3	17596944	17597281	338	No	0
3	17612429	17612782	354	No	0
3	17620914	17621258	345	No	0
3	17727351	17727712	362	No	0
3	18409405	18409668	264	No	0
3	18793678	18793958	281	Yes	0
3	19114587	19114912	326	Yes	0
3	19814936	19815281	346	No	0
3	21626639	21626942	304	Yes	0
3	21650931	21651256	326	No	1
3	21702684	21702993	310	Yes	0
3	22518969	22519193	225	No	0
3	22548979	22549326	348	No	0
3	22797442	22797747	306	No	0
3	24745357	24745593	237	No	0
3	24752725	24753025	301	Yes	0
3	25637890	25638173	284	No	0
3	25816411	25816706	296	Yes	0
3	25901380	25901701	322	No	0
3	26417618	26417905	288	Yes	0
3	27078150	27078543	394	Yes	0
3	27506475	27506771	297	No	0
3	27989020	27989300	281	Yes	0
3	28474242	28474528	287	No	0
3	28554650	28555021	372	Yes	0
3	28892804	28893045	242	No	0
3	29370259	29370574	316	No	0
3	30189315	30189631	317	No	0
3	30388309	30388628	320	No	1
3	30636545	30636855	311	No	0
3	31217399	31217719	321	Yes	0
3	31296181	31296540	360	Yes	0
3	31333428	31333765	338	Yes	0
3	31416046	31416358	313	Yes	0
3	31568863	31569163	301	No	0
3	32374030	32374343	314	No	0
3	32592860	32593159	300	Yes	0
3	32654147	32654499	353	Yes	0
3	32827895	32828087	193	Yes	0
3	32836282	32836576	295	Yes	0
3	33082146	33082412	267	No	0
3	33142454	33142716	263	Yes	0
3	33463589	33463885	297	Yes	0
3	33519414	33519658	245	Yes	0
3	33543321	33543681	361	Yes	1
3	33834227	33834623	397	Yes	0
3	33882884	33883196	313	Yes	0
3	33891975	33892328	354	Yes	0
3	34128856	34129203	348	Yes	0
3	34146116	34146418	303	Yes	0
3	34379498	34379784	287	Yes	0
3	34449705	34449882	178	Yes	0
3	34466498	34466827	330	Yes	0
3	34516287	34516584	298	Yes	0
3	34582769	34582891	123	Yes	0
3	34582891	34583071	181	Yes	0
3	34673307	34673606	300	Yes	0
3	34822844	34823025	182	Yes	0
3	34836628	34836876	249	Yes	0
3	35028169	35028481	313	Yes	0
3	35064298	35064611	314	Yes	0
3	35155768	35156033	266	Yes	0
3	35225380	35225722	343	Yes	0
3	35318050	35318359	310	Yes	0
3	35322427	35322645	219	Yes	0
3	35325255	35325528	274	Yes	0
3	35419612	35419860	249	Yes	0
3	35470215	35470336	122	Yes	0
3	35639711	35640072	362	Yes	0
3	35713907	35714187	281	Yes	0
3	35902972	35903078	107	No	0
3	35998823	35998945	123	Yes	0
3	36083105	36083315	211	Yes	0
3	36139018	36139342	325	Yes	0
3	36149425	36149607	183	Yes	0
3	36322235	36322408	174	Yes	0
3	36424899	36425269	371	Yes	0
3	36566545	36566662	118	Yes	0
3	36786788	36786974	187	Yes	0
3	36819249	36819571	323	Yes	0
3	37095759	37096017	259	Yes	0
3	37199664	37199954	291	Yes	0
4	112110	112383	274	Yes	0
4	395318	395540	223	No	0
4	409525	409761	237	Yes	1
4	659057	659197	141	No	0
4	924730	924826	97	No	0
4	1110131	1110339	209	Yes	0
4	1163753	1163868	116	Yes	0
4	1430618	1430866	249	Yes	0
4	1815104	1815204	101	No	0
4	1853308	1853467	160	Yes	0
4	1909235	1909503	269	Yes	0
4	2211960	2212405	446	Yes	0
4	2484988	2485180	193	Yes	0
4	2497380	2497524	145	No	0
4	2625725	2626021	297	Yes	0
4	2637862	2638131	270	Yes	0
4	2718915	2719192	278	Yes	0
4	2798997	2799076	80	No	0
4	3175652	3175759	108	No	0
4	3215399	3215592	194	No	0
4	3407932	3408220	289	Yes	0
4	3460520	3460818	299	Yes	0
4	3811023	3811358	336	Yes	0
4	3896675	3897046	372	Yes	0
4	3937162	3937412	251	No	0
4	4106710	4106898	189	No	0
4	4125397	4125587	191	Yes	1
4	4288468	4288586	119	No	0
4	4303882	4304026	145	No	0
4	4400803	4401100	298	No	0
4	4414954	4415088	135	No	0
4	4501339	4501580	242	Yes	0
4	4547995	4548203	209	Yes	0
4	4880203	4880382	180	No	0
4	5147720	5147880	161	No	0
4	5255554	5255764	211	Yes	0
4	5263145	5263304	160	No	0
4	5514123	5514465	343	Yes	0
4	5656796	5656963	168	Yes	0
4	6106245	6106396	152	No	0
4	6142677	6142849	173	No	0
4	6271192	6271513	322	Yes	0
4	6457490	6457682	193	Yes	0
4	6583637	6583756	120	No	0
4	7304932	7305074	143	Yes	0
4	7412024	7412375	352	Yes	1
4	7636673	7636944	272	Yes	0
4	7780280	7780426	147	No	0
4	7784911	7785133	223	No	0
4	8041507	8041788	282	No	0
4	8183241	8183586	346	Yes	0
4	8323812	8324196	385	Yes	0
4	8486344	8486601	258	No	0
4	8592231	8592410	180	No	0
4	8733998	8734335	338	Yes	1
4	8738357	8738695	339	Yes	0
4	8760119	8760413	295	Yes	0
4	8897271	8897410	140	No	0
4	8918659	8918784	126	No	0
4	9603859	9604247	389	Yes	0
4	11600227	11600540	314	Yes	0
4	11995619	11995936	318	No	0
4	12187868	12188191	324	No	0
4	13651736	13652119	384	Yes	0
4	13768820	13769180	361	No	1
4	13968728	13969107	380	Yes	0
4	14086305	14086755	451	Yes	0
4	14407356	14407708	353	Yes	0
4	14989320	14989662	343	Yes	1
4	16595341	16595661	321	No	0
4	16647955	16648268	314	Yes	0
4	19366930	19367152	223	Yes	0
4	19391691	19391983	293	Yes	0
4	19498160	19498456	297	Yes	0
4	19524759	19525065	307	No	0
4	19872377	19872706	330	Yes	0
4	20027432	20027669	238	No	0
4	20084109	20084402	294	Yes	0
4	20125941	20126225	285	Yes	0
4	21748074	21748344	271	No	0
4	22259023	22259336	314	No	1
4	22739877	22740243	367	Yes	0
4	23029074	23029385	312	Yes	0
4	23330794	23331149	356	Yes	0
4	23601692	23602066	375	Yes	0
4	23912155	23912496	342	Yes	0
4	23921357	23921657	301	No	0
4	24197251	24197572	322	Yes	0
4	24296902	24297218	317	Yes	0
4	24348230	24348585	356	Yes	0
4	24478699	24478994	296	Yes	0
4	24611074	24611339	266	Yes	0
4	24616984	24617294	311	Yes	0
4	24638834	24639032	199	Yes	0
4	24785168	24785302	135	Yes	0
4	24908565	24908861	297	Yes	0
4	24963002	24963241	240	No	0
4	25114479	25114715	237	Yes	0
4	25159378	25159678	301	Yes	0
4	25361400	25361559	160	Yes	0
4	25499866	25500065	200	No	0
4	25778155	25778440	286	Yes	0
4	25948687	25948897	211	No	0
4	25994743	25995069	327	Yes	0
4	26001251	26001449	199	Yes	0
4	26353233	26353501	269	Yes	0
4	26714935	26715260	326	Yes	0
4	26739782	26740061	280	Yes	0
4	26886364	26886701	338	Yes	0
4	26893425	26893529	105	Yes	0
4	26950720	26951054	335	Yes	0
4	27074990	27075272	283	Yes	0
4	27077666	27077921	256	No	0
4	27424260	27424566	307	Yes	0
4	27452790	27452896	107	No	0
4	27490844	27491061	218	No	0
4	27676699	27676991	293	Yes	0
4	27708081	27708262	182	Yes	0
4	27872164	27872408	245	No	0
4	27876445	27876622	178	No	0
4	27909211	27909446	236	No	0
4	28143318	28143618	301	Yes	0
4	28148619	28148810	192	No	0
4	28197477	28197745	269	Yes	0
4	28204550	28204717	168	No	0
4	28343289	28343559	271	Yes	0
4	28349577	28349892	316	Yes	0
4	28721044	28721388	345	Yes	0
4	29222428	29222721	294	No	1
4	29390312	29390534	223	Yes	0
4	29408673	29408879	207	Yes	0
4	29703769	29703869	101	No	0
4	29791660	29791944	285	No	0
4	29806187	29806455	269	Yes	0
4	29841590	29841949	360	Yes	0
4	29891911	29892168	258	No	0
4	30005762	30006092	331	Yes	0
4	30108211	30108515	305	Yes	0
4	30138154	30138254	101	No	0
4	30161321	30161651	331	Yes	0
4	30262965	30263293	329	Yes	0
4	30497186	30497406	221	No	0
4	30527117	30527538	422	No	0
4	30717585	30717847	263	Yes	0
4	30777191	30777499	309	Yes	0
4	30804831	30805115	285	Yes	0
4	30952788	30952906	119	Yes	0
4	31374108	31374429	322	Yes	0
4	31568491	31568816	326	Yes	0
4	31634124	31634303	180	No	0
4	31736634	31736926	293	Yes	0
4	31771928	31772078	151	No	0
4	31807109	31807227	119	Yes	0
4	31828371	31828687	317	Yes	2
4	31863698	31863818	121	No	0
4	31956309	31956409	101	No	0
4	31956418	31956557	140	No	0
4	31971847	31971954	108	Yes	0
4	32015828	32016166	339	Yes	0
4	32022873	32023193	321	Yes	0
4	32040150	32040260	111	Yes	0
4	32131379	32131650	272	Yes	0
4	32164654	32164887	234	Yes	0
4	32415821	32416007	187	No	0
4	32430071	32430404	334	Yes	0
4	32584037	32584225	189	Yes	0
4	32798479	32798689	211	No	0
4	32836005	32836169	165	Yes	0
4	32954487	32954608	122	No	0
4	33043354	33043499	146	Yes	0
4	33108568	33108745	178	Yes	0
4	33137429	33137652	224	Yes	0
4	33402257	33402452	196	Yes	0
4	33410675	33410824	150	Yes	0
4	33658772	33658885	114	No	0
4	33664454	33664763	310	Yes	0
4	33678582	33678734	153	Yes	0
4	33837999	33838268	270	Yes	0
4	33852073	33852367	295	No	0
4	33887634	33887841	208	No	0
4	33994402	33994550	149	No	0
4	34025901	34026014	114	Yes	0
4	34070144	34070417	274	Yes	0
4	34177110	34177377	268	No	0
4	34218549	34218707	159	Yes	0
4	34296728	34296981	254	Yes	0
4	34414635	34414955	321	Yes	0
4	34704876	34705195	320	Yes	0
4	34786395	34786578	184	Yes	0
4	34926169	34926435	267	Yes	0
4	34995625	34995936	312	Yes	0
4	35031100	35031209	110	No	0
4	35090827	35091009	183	Yes	0
4	35098882	35099247	366	Yes	0
4	35195253	35195416	164	Yes	0
4	35196150	35196367	218	Yes	0
4	35256283	35256650	368	Yes	0
4	35407208	35407641	434	Yes	0
4	35414601	35414873	273	Yes	0
4	35511874	35511975	102	Yes	0
4	35612420	35612703	284	Yes	0
4	35668407	35668998	592	Yes	0
4	35778878	35779186	309	Yes	0
5	118876	119070	195	No	0
5	673169	673459	291	Yes	0
5	683538	683855	318	Yes	0
5	706453	706642	190	Yes	0
5	776383	776581	199	Yes	0
5	909305	909411	107	No	0
5	999293	999391	99	Yes	0
5	1077788	1078072	285	Yes	0
5	1103242	1103547	306	Yes	0
5	1150740	1150963	224	No	0
5	1250961	1251307	347	Yes	0
5	1304499	1304742	244	Yes	0
5	1454434	1454578	145	Yes	0
5	1457783	1457920	138	Yes	0
5	1564422	1564738	317	Yes	0
5	1579997	1580282	286	Yes	0
5	1613919	1614140	222	Yes	0
5	1632011	1632240	230	Yes	0
5	1636137	1636358	222	Yes	0
5	1645763	1646011	249	Yes	0
5	1698003	1698171	169	No	0
5	1698329	1698474	146	Yes	0
5	1713027	1713327	301	No	0
5	1904659	1905001	343	Yes	0
5	1923739	1924003	265	Yes	0
5	2104883	2105103	221	Yes	0
5	2118718	2118949	232	Yes	0
5	2171954	2172155	202	Yes	0
5	2185055	2185381	327	Yes	0
5	2248095	2248206	112	No	0
5	2270626	2270842	217	No	0
5	2321809	2322147	339	Yes	0
5	2322994	2323274	281	Yes	0
5	2607578	2607906	329	Yes	0
5	2903988	2904384	397	Yes	0
5	3012997	3013249	253	Yes	0
5	3083624	3083996	373	Yes	0
5	3197071	3197362	292	Yes	1
5	3281615	3281801	187	Yes	0
5	3302914	3303215	302	Yes	0
5	3472071	3472372	302	Yes	0
5	3669743	3669908	166	Yes	0
5	4139446	4139642	197	Yes	0
5	4140203	4140484	282	No	0
5	4474628	4474827	200	Yes	0
5	4487242	4487542	301	Yes	0
5	4602182	4602526	345	Yes	1
5	4665450	4665757	308	Yes	0
5	4735609	4735769	161	Yes	1
5	4777172	4777442	271	Yes	0
5	4870471	4870622	152	Yes	0
5	4983189	4983412	224	No	0
5	5021560	5021872	313	Yes	0
5	5167503	5167693	191	Yes	0
5	5209563	5209869	307	Yes	0
5	5310119	5310373	255	Yes	0
5	5353964	5354316	353	Yes	0
5	5490007	5490321	315	Yes	0
5	5621930	5622181	252	Yes	0
5	5628099	5628305	207	Yes	0
5	5719383	5719709	327	Yes	0
5	5789992	5790201	210	Yes	0
5	5796999	5797279	281	Yes	0
5	5823254	5823412	159	No	0
5	5927014	5927559	546	Yes	0
5	5997362	5997505	144	No	0
5	6005470	6005778	309	Yes	0
5	6084974	6085263	290	Yes	0
5	6087126	6087434	309	Yes	0
5	6158931	6159172	242	Yes	0
5	6778507	6778618	112	Yes	0
5	6931096	6931323	228	No	0
5	7031523	7031854	332	Yes	0
5	7285631	7285832	202	Yes	0
5	7790272	7790547	276	No	0
5	7858963	7859246	284	No	0
5	7876770	7876962	193	No	0
5	7877200	7877474	275	Yes	0
5	7888120	7888287	168	No	0
5	8113030	8113329	300	Yes	0
5	8222484	8222760	277	Yes	0
5	8451670	8451907	238	Yes	0
5	8498100	8498422	323	Yes	0
5	8535454	8535730	277	Yes	0
5	8733238	8733392	155	Yes	0
5	8794586	8794919	334	Yes	0
5	8829994	8830233	240	Yes	0
5	8863114	8863410	297	Yes	0
5	8966245	8966578	334	Yes	1
5	9495003	9495246	244	No	0
5	9856514	9856737	224	No	0
5	9876518	9876780	263	Yes	0
5	9996936	9997102	167	No	0
5	10178931	10179124	194	No	0
5	10317939	10318089	151	No	0
5	10343894	10344052	159	No	0
5	10560000	10560385	386	No	0
5	10593238	10593416	179	Yes	0
5	10610653	10610841	189	Yes	0
5	10706723	10706976	254	No	0
5	10924675	10924806	132	No	0
5	10995861	10996123	263	Yes	0
5	11426795	11426940	146	No	0
5	12126616	12126745	130	No	0
5	12132351	12132710	360	Yes	0
5	13737553	13737986	434	Yes	0
5	13952380	13952567	188	Yes	1
5	14064515	14064798	284	Yes	0
5	14076014	14076188	175	Yes	0
5	14119334	14119492	159	No	0
5	14123692	14123843	152	No	0
5	14311540	14311882	343	Yes	0
5	14320436	14320758	323	No	0
5	14342162	14342484	323	Yes	0
5	14342580	14342836	257	Yes	0
5	14481939	14482203	265	Yes	0
5	14499318	14499463	146	No	0
5	14501512	14501649	138	Yes	0
5	14680000	14680327	328	Yes	0
5	14734000	14734268	269	Yes	0
5	14976518	14976705	188	Yes	0
5	15019706	15020094	389	Yes	0
5	15096228	15096527	300	Yes	0
5	15118610	15118762	153	Yes	0
5	15156352	15156528	177	Yes	0
5	15188600	15188760	161	No	0
5	15302748	15303006	259	No	0
5	15590961	15591267	307	Yes	0
5	15676229	15676401	173	No	0
5	15789315	15789601	287	Yes	0
5	16182910	16183233	324	Yes	0
5	16237215	16237521	307	Yes	0
5	16294144	16294484	341	Yes	0
5	16329377	16329691	315	Yes	0
5	16335142	16335467	326	Yes	0
5	16348644	16348983	340	Yes	0
5	16485305	16485448	144	No	0
5	16503222	16503435	214	No	0
5	16814202	16814339	138	Yes	0
5	16956634	16956988	355	Yes	0
5	17324852	17325042	191	No	0
5	17359314	17359489	176	No	0
5	17362170	17362327	158	No	0
5	17458953	17459073	121	No	0
5	17578476	17578883	408	Yes	0
5	17651142	17651393	252	Yes	0
5	18096138	18096377	240	Yes	0
5	18115351	18115652	302	Yes	1
5	18144087	18144257	171	Yes	0
5	18164108	18164211	104	No	0
5	18198973	18199177	205	Yes	0
5	18933813	18934099	287	Yes	0
5	18943007	18943310	304	Yes	0
5	18976665	18976887	223	Yes	0
5	19017595	19017841	247	Yes	0
5	19083972	19084250	279	Yes	0
5	19473317	19473508	192	Yes	0
5	19591720	19591845	126	Yes	0
5	19596180	19596331	152	Yes	0
5	19646479	19646607	129	No	0
5	19754630	19754945	316	Yes	0
5	19932729	19932848	120	No	0
5	19960819	19960949	131	No	0
5	19960950	19961078	129	No	0
5	20648073	20648389	317	Yes	0
5	20661268	20661464	197	Yes	0
5	20713805	20713959	155	Yes	0
5	20735776	20736057	282	Yes	0
5	20822236	20822560	325	Yes	0
5	20830942	20831123	182	Yes	0
5	20845247	20845504	258	Yes	0
5	20959941	20960042	102	Yes	0
5	21112606	21112820	215	Yes	0
5	21198777	21198928	152	Yes	0
5	21556060	21556355	296	Yes	0
5	21582996	21583207	212	Yes	0
5	21661523	21661623	101	No	0
5	21679675	21679835	161	Yes	0
5	21715952	21716222	271	Yes	0
5	21999832	22000124	293	Yes	0
5	22123048	22123303	256	Yes	0
5	22143146	22143482	337	Yes	0
5	22165137	22165417	281	Yes	0
5	22172535	22172742	208	Yes	0
5	22466815	22467015	201	Yes	0
5	22522111	22522303	193	Yes	0
5	22553333	22553634	302	Yes	0
5	22614120	22614253	134	Yes	0
5	22686052	22686207	156	Yes	1
5	22779371	22779475	105	No	0
5	22899144	22899269	126	Yes	0
5	22909947	22910300	354	Yes	0
5	22921760	22922054	295	Yes	0
5	23003042	23003246	205	Yes	0
5	23107124	23107230	107	Yes	0
5	23107232	23107398	167	Yes	0
5	23128710	23128953	244	No	1
5	23193484	23193754	271	Yes	0
5	23198470	23198674	205	Yes	0
5	23252753	23252874	122	Yes	0
5	23335071	23335134	64	Yes	0
5	23342737	23342934	198	Yes	0
5	23422134	23422424	291	Yes	0
5	23430599	23430891	293	Yes	0
5	23433688	23433979	292	Yes	0
5	23459583	23459875	293	Yes	0
5	23569651	23570003	353	Yes	0
5	23638166	23638547	382	Yes	0
5	23643763	23644105	343	Yes	0
5	23708342	23708526	185	Yes	0
5	23714313	23714601	289	Yes	0
5	23798099	23798417	319	Yes	0
5	23832045	23832348	304	Yes	0
5	24124591	24124906	316	Yes	0
5	24207100	24207316	217	Yes	0
5	24270950	24271162	213	Yes	0
5	24307488	24307771	284	Yes	0
5	24315961	24316252	292	Yes	0
5	24372476	24372736	261	Yes	0
5	24380286	24380554	269	Yes	0
5	24466327	24466546	220	Yes	0
5	24526125	24526235	111	Yes	0
5	24531289	24531625	337	Yes	0
5	24752506	24752730	225	Yes	0
5	24879177	24879480	304	Yes	0
5	25093955	25094271	317	Yes	0
5	25178688	25178903	216	Yes	0
5	25311371	25311642	272	Yes	0
5	25468196	25468533	338	Yes	0
5	25473383	25473705	323	Yes	0
5	25538971	25539173	203	Yes	0
5	25593426	25593735	310	Yes	1
5	25711394	25711611	218	Yes	0
5	25789685	25789917	233	Yes	0
5	26063546	26063821	276	Yes	0
5	26123601	26123790	190	Yes	0
5	26124119	26124213	95	Yes	0
5	26306539	26306765	227	Yes	0
5	26389078	26389473	396	Yes	0
5	26460298	26460398	101	Yes	0
5	26476690	26476869	180	Yes	0
5	26635850	26635963	114	No	0
5	26657670	26658018	349	Yes	0
5	26772806	26773126	321	Yes	0
5	26915907	26916219	313	Yes	0
5	26967610	26967811	202	Yes	0
5	27067718	27067999	282	Yes	0
5	27091868	27092238	371	Yes	0
5	27120825	27121140	316	Yes	0
5	27234437	27234560	124	Yes	0
5	27235662	27236004	343	Yes	0
5	27427480	27427758	279	Yes	1
5	27478280	27478380	101	Yes	0
5	27573298	27573591	294	Yes	0
5	27631214	27631409	196	No	0
5	27644333	27644612	280	Yes	0
5	27645784	27646026	243	Yes	1
5	27778770	27778887	118	Yes	0
5	27790433	27790702	270	Yes	0
5	28000598	28000811	214	Yes	0
5	28055744	28055852	109	No	1
5	28181532	28181684	153	Yes	0
5	28182028	28182281	254	Yes	0
5	28183442	28183878	437	Yes	0
5	28186636	28187132	497	Yes	0
5	28233900	28234140	241	Yes	0
5	28250541	28250790	250	Yes	0
5	28269520	28269876	357	Yes	0
5	28292022	28292337	316	Yes	0
5	28385487	28385825	339	Yes	0
5	28500327	28500591	265	Yes	0
5	28585698	28585950	253	Yes	0
5	28588220	28588536	317	Yes	0
5	28634085	28634187	103	No	0
5	28682310	28682610	301	Yes	1
5	28727764	28727927	164	Yes	0
5	28782940	28783127	188	Yes	0
5	28827922	28828137	216	Yes	0
5	28899304	28899644	341	Yes	0
5	28974994	28975258	265	No	0
5	29261212	29261406	195	Yes	0
5	29442580	29442768	189	Yes	0
5	29461838	29462004	167	Yes	0
5	29481446	29481708	263	Yes	0
5	29548666	29548816	151	Yes	0
5	29584685	29584867	183	Yes	0
5	29657931	29658280	350	Yes	0
6	140820	141065	246	Yes	1
6	486036	486286	251	Yes	0
6	487968	488186	219	Yes	1
6	642270	642586	317	Yes	2
6	1138008	1138315	308	Yes	1
6	1154623	1154980	358	Yes	1
6	1280269	1280447	179	Yes	0
6	1283712	1283955	244	Yes	9
6	1400257	1400537	281	Yes	0
6	1433378	1433630	253	Yes	2
6	1451889	1452211	323	Yes	0
6	1467795	1468147	353	Yes	1
6	1760185	1760351	167	Yes	1
6	1761532	1761773	242	Yes	1
6	1785108	1785231	124	Yes	0
6	2240544	2240776	233	Yes	2
6	2384468	2384689	222	Yes	2
6	2472378	2472579	202	Yes	1
6	2629438	2629758	321	Yes	0
6	2795262	2795397	136	No	0
6	2812193	2812375	183	Yes	0
6	2862135	2862433	299	Yes	2
6	2897539	2897857	319	Yes	2
6	2956917	2957054	138	Yes	0
6	3076862	3077043	182	Yes	2
6	3092553	3092822	270	Yes	2
6	3126871	3127113	243	No	2
6	3130487	3130772	286	Yes	2
6	3140561	3140825	265	Yes	2
6	3311559	3311788	230	Yes	0
6	3337244	3337545	302	Yes	0
6	3454035	3454365	331	Yes	1
6	3555114	3555249	136	No	1
6	3584375	3584552	178	Yes	2
6	3594871	3595054	184	Yes	2
6	3651783	3651993	211	Yes	1
6	3662886	3663081	196	Yes	1
6	3677898	3678112	215	Yes	1
6	3681093	3681353	261	Yes	2
6	3721694	3721836	143	No	0
6	3808151	3808253	103	No	0
6	3830538	3830857	320	Yes	3
6	3868602	3868914	313	Yes	3
6	3951740	3952013	274	Yes	2
6	3972007	3972164	158	Yes	1
6	3993553	3993832	280	No	0
6	4003594	4003874	281	Yes	2
6	4279779	4279886	108	No	0
6	4286924	4287170	247	Yes	1
6	4330868	4331045	178	Yes	3
6	4344067	4344397	331	Yes	2
6	4629405	4629553	149	No	1
6	4672135	4672405	271	Yes	2
6	4714306	4714650	345	Yes	0
6	4715507	4715816	310	Yes	1
6	4806648	4806926	279	Yes	1
6	4881575	4881839	265	Yes	0
6	4919339	4919531	193	Yes	1
6	4939664	4939959	296	Yes	0
6	4943760	4943901	142	No	1
6	4954774	4955076	303	Yes	0
6	4958898	4959092	195	No	1
6	4996771	4996961	191	Yes	2
6	5098327	5098632	306	Yes	1
6	5099194	5099499	306	Yes	0
6	5117124	5117425	302	Yes	2
6	5152798	5153127	330	Yes	2
6	5172752	5172942	191	Yes	1
6	5375037	5375137	101	Yes	1
6	5551835	5552022	188	Yes	0
6	5612751	5612946	196	Yes	2
6	5805953	5806258	306	Yes	1
6	5812319	5812678	360	Yes	2
6	5895334	5895635	302	Yes	0
6	5905004	5905258	255	Yes	0
6	5918667	5918914	248	Yes	0
6	5919308	5919612	305	Yes	1
6	5941794	5942145	352	Yes	1
6	6206234	6206426	193	Yes	1
6	6224886	6225089	204	No	2
6	6255685	6255838	154	Yes	0
6	6290672	6290896	225	Yes	0
6	6356938	6357259	322	Yes	1
6	6393928	6394228	301	Yes	3
6	6529801	6529899	99	Yes	0
6	6588010	6588300	291	No	0
6	6918378	6918676	299	Yes	1
6	6948686	6948780	95	No	0
6	7016574	7016709	136	No	0
6	7291329	7291567	239	Yes	0
6	7540921	7541213	293	Yes	2
6	7671927	7672281	355	Yes	3
6	7683214	7683570	357	Yes	0
6	7688583	7688846	264	No	2
6	7761843	7762058	216	No	0
6	7923605	7923854	250	Yes	2
6	7968013	7968237	225	No	1
6	8252902	8253040	139	No	0
6	8278097	8278477	381	Yes	2
6	8300605	8300788	184	Yes	1
6	8356269	8356400	132	Yes	0
6	8467084	8467297	214	Yes	1
6	8980988	8981150	163	Yes	0
6	9135563	9135880	318	Yes	2
6	9211377	9211577	201	Yes	1
6	9392242	9392351	110	Yes	0
6	9393932	9394053	122	Yes	0
6	9445812	9446137	326	Yes	4
6	9912618	9912818	201	Yes	0
6	10035101	10035321	221	Yes	1
6	10116352	10116505	154	Yes	0
6	10137951	10138161	211	Yes	2
6	10175075	10175363	289	Yes	4
6	10740215	10740550	336	Yes	2
6	10925822	10925971	150	No	0
6	11085601	11085842	242	No	1
6	11107750	11108008	259	Yes	1
6	11218326	11218490	165	No	2
6	11356757	11356958	202	Yes	0
6	11418226	11418457	232	Yes	3
6	11457091	11457411	321	Yes	2
6	11703143	11703250	108	No	0
6	11703271	11703402	132	No	0
6	11867611	11867901	291	No	4
6	12254231	12254478	248	Yes	1
6	12439898	12440186	289	Yes	2
6	12465967	12466211	245	No	0
6	12500535	12500783	249	Yes	2
6	12616471	12616716	246	Yes	0
6	12659466	12659886	421	Yes	3
6	12671590	12671857	268	Yes	0
6	12688110	12688365	256	Yes	2
6	12748458	12748762	305	No	0
6	12761508	12761638	131	No	0
6	12799033	12799182	150	No	2
6	12860448	12860724	277	Yes	2
6	12942590	12942809	220	Yes	0
6	13002061	13002284	224	Yes	0
6	13041101	13041214	114	Yes	0
6	13391452	13391635	184	Yes	1
6	13443107	13443301	195	No	1
6	13508057	13508198	142	Yes	1
6	13633943	13634208	266	Yes	2
6	13781851	13782068	218	No	0
6	13798129	13798390	262	No	1
6	13954245	13954661	417	Yes	6
6	14186923	14187187	265	Yes	3
6	14460004	14460275	272	Yes	1
6	14520085	14520393	309	No	4
6	14537658	14537927	270	Yes	3
6	14668799	14669041	243	No	2
6	14738183	14738398	216	No	2
6	15072821	15073105	285	No	4
6	15130752	15131117	366	Yes	2
6	15273914	15274227	314	Yes	0
6	15352672	15352989	318	No	2
6	15437989	15438264	276	Yes	2
6	16382956	16383279	324	No	4
6	16465218	16465510	293	Yes	2
6	16574523	16574647	125	No	0
6	16842495	16842659	165	No	2
6	16915737	16916079	343	Yes	2
6	17117396	17117716	321	Yes	0
6	17147895	17148004	110	No	0
6	17220888	17221194	307	Yes	0
6	17234031	17234384	354	Yes	2
6	17255357	17255457	101	No	0
6	17536282	17536619	338	Yes	2
6	17699578	17699816	239	No	0
6	17983239	17983497	259	Yes	2
6	18095050	18095364	315	Yes	1
6	18173279	18173380	102	No	0
6	18231142	18231423	282	Yes	1
6	18245515	18245724	210	Yes	0
6	18274637	18274897	261	No	2
6	18279756	18280052	297	No	1
6	18326670	18326912	243	No	2
6	18699455	18699731	277	Yes	2
6	18747677	18748070	394	Yes	4
6	18809007	18809157	151	No	1
6	20013154	20013319	166	No	2
6	20152737	20153110	374	Yes	9
6	20154859	20155046	188	No	2
6	20164082	20164272	191	No	1
6	20185572	20185761	190	Yes	0
6	20189741	20190043	303	Yes	1
6	20269962	20270230	269	No	0
6	20272141	20272417	277	Yes	0
6	20286667	20286858	192	Yes	1
6	20528567	20528850	284	Yes	2
6	20934361	20934469	109	No	1
6	20970113	20970311	199	Yes	1
6	20983264	20983582	319	No	1
6	21138248	21138491	244	Yes	2
6	21746727	21747089	363	Yes	1
6	21817286	21817441	156	Yes	0
6	21838328	21838672	345	Yes	2
6	21921442	21921722	281	Yes	0
6	22039860	22040068	209	Yes	1
6	22064140	22064466	327	Yes	2
6	22636564	22636872	309	Yes	2
6	22637678	22637962	285	Yes	1
6	22701114	22701450	337	Yes	0
6	22713370	22713557	188	Yes	1
6	22759370	22759682	313	Yes	2
6	23196477	23196690	214	Yes	1
6	23473253	23473590	338	Yes	2
6	23475512	23475662	151	Yes	0
6	23779385	23779729	345	Yes	2
6	23784057	23784406	350	Yes	2
6	23907649	23907820	172	No	2
6	24003058	24003229	172	No	1
6	24081392	24081655	264	Yes	0
6	24120302	24120511	210	Yes	0
6	24457399	24457552	154	No	0
6	24459953	24460244	292	No	0
6	24468077	24468372	296	Yes	0
6	24581429	24581535	107	Yes	1
6	24617639	24617965	327	Yes	2
6	24704428	24704660	233	Yes	1
6	24838426	24838722	297	Yes	1
6	24914540	24914883	344	Yes	1
6	25113727	25114022	296	No	1
6	25201029	25201339	311	Yes	1
6	25257760	25258111	352	Yes	4
6	25305183	25305710	528	Yes	4
6	25408957	25409229	273	Yes	1
6	25569440	25569582	143	Yes	1
6	25718599	25718927	329	Yes	2
6	25815294	25815590	297	Yes	1
6	25940217	25940537	321	Yes	0
6	26164854	26164959	106	No	0
6	26222344	26222553	210	Yes	2
6	26310111	26310315	205	No	2
6	26559227	26559474	248	Yes	1
6	26618566	26618946	381	Yes	3
6	26661115	26661284	170	Yes	0
6	26742134	26742249	116	Yes	1
6	26744193	26744405	213	Yes	0
6	26780777	26781128	352	Yes	1
6	26794988	26795259	272	Yes	1
6	26939313	26939437	125	No	1
6	27064575	27064863	289	Yes	0
6	27346513	27346838	326	Yes	2
6	27462380	27462508	129	Yes	1
6	27526728	27527055	328	Yes	2
6	27550424	27550612	189	Yes	1
6	27670115	27670307	193	Yes	1
6	27695956	27696102	147	Yes	0
6	27727288	27727575	288	Yes	1
6	27754469	27754606	138	Yes	0
6	27897473	27897596	124	Yes	0
6	27927677	27927983	307	Yes	2
6	27973055	27973290	236	Yes	2
6	28146961	28147084	124	Yes	0
6	28249080	28249183	104	Yes	0
6	28330904	28331005	102	No	1
6	28472728	28473044	317	Yes	1
6	28579512	28579692	181	Yes	2
6	28685693	28685976	284	Yes	1
6	28733926	28734120	195	No	0
6	28911381	28911690	310	Yes	2
6	28914363	28914653	291	Yes	0
6	28922487	28922623	137	Yes	0
6	28985731	28985944	214	Yes	2
6	29205222	29205432	211	No	4
6	29317274	29317608	335	No	0
6	29360303	29360558	256	Yes	2
6	29365850	29366226	377	Yes	1
6	29370933	29371078	146	Yes	1
6	29452270	29452491	222	No	1
6	29529452	29529778	327	Yes	1
6	29634383	29634628	246	Yes	1
6	29651377	29651680	304	Yes	1
6	29726524	29726705	182	No	0
6	29792916	29793215	300	No	0
6	29834998	29835123	126	No	2
6	29950994	29951191	198	Yes	2
6	30012858	30013182	325	Yes	2
6	30026527	30026689	163	Yes	1
6	30241473	30241607	135	No	0
6	30265433	30265734	302	Yes	1
6	30354232	30354447	216	No	1
6	30367904	30368116	213	Yes	0
6	30528395	30528690	296	Yes	1
6	30543951	30544111	161	Yes	1
6	30634701	30634987	287	No	1
6	30700250	30700475	226	No	0
6	30971751	30971865	115	No	1
6	31223874	31223984	111	No	0
6	31229824	31230134	311	Yes	3
6	31252030	31252395	366	Yes	3
6	31382544	31382771	228	Yes	0
6	31453723	31454043	321	Yes	2
6	31487743	31488049	307	Yes	2
6	31554382	31554700	319	Yes	2
6	31569870	31570183	314	Yes	2
6	31888810	31889101	292	No	1
6	31976267	31976441	175	Yes	2
6	32077730	32078192	463	Yes	5
7	342153	342271	119	No	0
7	436987	437318	332	Yes	2
7	697937	698189	253	Yes	1
7	911648	911955	308	Yes	1
7	977069	977390	322	Yes	2
7	1021447	1021707	261	No	0
7	1196328	1196552	225	No	1
7	1266571	1266719	149	No	0
7	1270227	1270341	115	No	0
7	1525016	1525410	395	Yes	6
7	1541323	1541541	219	Yes	1
7	1747641	1747744	104	Yes	1
7	1748870	1749094	225	Yes	1
7	1817357	1817620	264	Yes	0
7	2135901	2136139	239	Yes	2
7	2282656	2282930	275	Yes	0
7	2638169	2638336	168	Yes	1
7	2690854	2691111	258	No	0
7	2703289	2703561	273	Yes	2
7	2900839	2901163	325	Yes	1
7	2912111	2912355	245	Yes	2
7	3212392	3212696	305	Yes	3
7	3273272	3273467	196	Yes	2
7	3335081	3335181	101	Yes	0
7	3378751	3378927	177	No	0
7	3606155	3606417	263	Yes	1
7	3700842	3700971	130	Yes	1
7	3716232	3716488	257	Yes	0
7	4066055	4066144	90	No	0
7	4076060	4076252	193	Yes	1
7	4298809	4299078	270	Yes	2
7	4333775	4333973	199	Yes	1
7	4375474	4375802	329	Yes	2
7	4453118	4453369	252	Yes	2
7	4556873	4557182	310	Yes	2
7	4560628	4560965	338	Yes	2
7	4596600	4596932	333	Yes	1
7	4608355	4608615	261	Yes	1
7	4728151	4728278	128	Yes	0
7	4731209	4731552	344	Yes	3
7	4766597	4766811	215	Yes	2
7	4853174	4853312	139	Yes	2
7	5045482	5045744	263	Yes	1
7	5201530	5201849	320	Yes	2
7	5204083	5204333	251	Yes	0
7	5399469	5399699	231	No	0
7	5498156	5498436	281	Yes	2
7	5560018	5560329	312	Yes	0
7	5569583	5569957	375	Yes	2
7	5670457	5670773	317	Yes	1
7	5892512	5892798	287	Yes	1
7	5976102	5976209	108	No	0
7	5982866	5983260	395	Yes	3
7	6061798	6061943	146	Yes	0
7	6322260	6322423	164	Yes	1
7	6459492	6459670	179	Yes	4
7	6944527	6944716	190	Yes	0
7	6995974	6996296	323	Yes	2
7	7001515	7001819	305	Yes	1
7	7160746	7160910	165	Yes	0
7	7171097	7171254	158	Yes	0
7	7190096	7190293	198	Yes	0
7	7348838	7349040	203	Yes	1
7	7417734	7417841	108	Yes	1
7	7426267	7426594	328	Yes	0
7	7612788	7613053	266	No	1
7	7932373	7932751	379	Yes	5
7	7956796	7956984	189	No	1
7	7989480	7989649	170	Yes	2
7	8142746	8143058	313	Yes	2
7	8248128	8248460	333	Yes	2
7	8370037	8370191	155	Yes	1
7	8527543	8527753	211	Yes	0
7	8984817	8985125	309	Yes	2
7	9021076	9021243	168	No	0
7	9156766	9156939	174	Yes	1
7	9381725	9382042	318	Yes	3
7	9550847	9551133	287	Yes	1
7	9574128	9574453	326	Yes	2
7	9584653	9584825	173	No	2
7	9586977	9587184	208	Yes	0
7	9590152	9590344	193	No	2
7	9594492	9594695	204	Yes	0
7	9714044	9714236	193	Yes	2
7	9721530	9721735	206	Yes	2
7	9735992	9736351	360	Yes	8
7	9758978	9759279	302	Yes	5
7	9822076	9822285	210	No	4
7	9830269	9830481	213	No	5
7	9833991	9834245	255	No	4
7	9879467	9879824	358	Yes	7
7	9925033	9925336	304	Yes	8
7	10526775	10527083	309	Yes	2
7	11333364	11333579	216	No	2
7	11518228	11518467	240	Yes	1
7	11528389	11528683	295	Yes	3
7	12112599	12112843	245	Yes	0
7	13201111	13201448	338	Yes	2
7	13463789	13463939	151	Yes	1
7	13487473	13487862	390	Yes	1
7	13508911	13509186	276	Yes	1
7	13586234	13586478	245	Yes	2
7	13627271	13627721	451	Yes	0
7	13654699	13655004	306	Yes	2
7	13983831	13984106	276	Yes	0
7	13999497	13999630	134	Yes	1
7	14076405	14076688	284	No	2
7	14101928	14102185	258	Yes	1
7	14466316	14466486	171	No	2
7	14473786	14473935	150	No	2
7	14599076	14599221	146	No	0
7	14607731	14607918	188	No	0
7	14640814	14640923	110	No	0
7	14649374	14649607	234	No	0
7	14794320	14794457	138	Yes	2
7	14868774	14868959	186	No	4
7	14870459	14870646	188	No	0
7	14875379	14875541	163	No	2
7	14897107	14897299	193	No	1
7	15062960	15063112	153	No	1
7	15094469	15094668	200	No	0
7	15126033	15126223	191	No	0
7	15323277	15323579	303	Yes	0
7	15838434	15838787	354	Yes	2
7	15972021	15972164	144	No	2
7	16016160	16016473	314	Yes	2
7	16055980	16056087	108	No	0
7	16562316	16562528	213	No	2
7	16566787	16566906	120	Yes	0
7	16783312	16783429	118	No	0
7	16795810	16796058	249	Yes	2
7	16905726	16906085	360	Yes	2
7	17205711	17205899	189	No	2
7	17592131	17592340	210	No	0
7	17734931	17735143	213	No	0
7	17826603	17826761	159	No	1
7	17984521	17984635	115	Yes	0
7	18064611	18064957	347	Yes	3
7	18184003	18184118	116	Yes	0
7	18254747	18255062	316	Yes	2
7	18291559	18291662	104	No	0
7	18376140	18376433	294	Yes	1
7	18458184	18458318	135	No	0
7	18529288	18529406	119	No	0
7	19720288	19720489	202	Yes	1
7	19850680	19850818	139	Yes	0
7	20032368	20032541	174	Yes	0
7	20075258	20075467	210	Yes	0
7	20116676	20116952	277	Yes	2
7	20328261	20328543	283	Yes	2
7	20461861	20462139	279	No	4
7	20542234	20542529	296	Yes	1
7	20549216	20549501	286	Yes	2
7	20598356	20598526	171	Yes	1
7	20865256	20865429	174	Yes	1
7	21021393	21021554	162	Yes	0
7	21174516	21174858	343	Yes	4
7	21262667	21263022	356	Yes	2
7	21354862	21355040	179	Yes	0
7	21611286	21611511	226	Yes	1
7	21694994	21695267	274	Yes	3
7	21764481	21764657	177	Yes	1
7	21817029	21817343	315	Yes	2
7	21924603	21924789	187	Yes	1
7	22032731	22033030	300	Yes	0
7	22116713	22116938	226	Yes	0
7	22180278	22180597	320	Yes	1
7	22182804	22182964	161	Yes	0
7	22251744	22251920	177	Yes	0
7	22263805	22264065	261	Yes	1
7	22274034	22274252	219	Yes	1
7	22296153	22296328	176	Yes	1
7	22514340	22514584	245	Yes	2
7	22705608	22705906	299	Yes	0
7	22828741	22828911	171	Yes	1
7	22890970	22891175	206	Yes	2
7	22896704	22896866	163	Yes	0
7	22934219	22934543	325	Yes	2
7	23068619	23068916	298	Yes	2
7	23070782	23071108	327	Yes	1
7	23080289	23080482	194	Yes	1
7	23109235	23109355	121	No	1
7	23205195	23205500	306	Yes	1
7	23205533	23205899	367	Yes	1
7	23239399	23239516	118	No	0
7	23286778	23287053	276	Yes	2
7	23287108	23287441	334	Yes	1
7	23435938	23436243	306	Yes	3
7	23551329	23551470	142	No	1
7	23660044	23660195	152	Yes	2
7	23717185	23717509	325	Yes	2
7	23717519	23717522	4	No	0
7	23717541	23717763	223	No	1
7	23935404	23935524	121	No	0
7	23962576	23962717	142	Yes	1
7	23987398	23987504	107	No	0
7	24038064	24038421	358	Yes	4
7	24063420	24063553	134	Yes	0
7	24077172	24077480	309	Yes	1
7	24319919	24320272	354	Yes	0
7	24337739	24338047	309	Yes	2
7	24604092	24604387	296	Yes	1
7	24652898	24653093	196	Yes	1
7	24697464	24697572	109	No	1
7	24698560	24698812	253	Yes	2
7	24746971	24747133	163	Yes	1
7	24812221	24812424	204	Yes	2
7	24939999	24940133	135	No	0
7	25015624	25015774	151	Yes	0
7	25017067	25017227	161	Yes	0
7	25145676	25145823	148	Yes	1
7	25229358	25229569	212	Yes	1
7	25348118	25348308	191	Yes	1
7	25379733	25379890	158	Yes	1
7	25468688	25469065	378	Yes	0
7	25492576	25492944	369	Yes	3
7	25498336	25498703	368	Yes	3
7	25597697	25597878	182	Yes	0
7	25598323	25598500	178	Yes	1
7	25819360	25819505	146	No	1
7	25983093	25983312	220	Yes	2
7	26105204	26105528	325	Yes	2
7	26300920	26301120	201	Yes	3
7	26366556	26366760	205	Yes	1
7	26369334	26369609	276	Yes	1
7	26390107	26390274	168	Yes	2
7	26429255	26429447	193	Yes	0
7	26603943	26604208	266	Yes	2
7	26604458	26604563	106	No	0
7	26664786	26664915	130	Yes	0
7	26747427	26747609	183	No	0
7	26796450	26796751	302	Yes	2
7	26848590	26848760	171	Yes	1
7	26850298	26850581	284	Yes	1
7	26913778	26914070	293	Yes	0
7	26916354	26916661	308	Yes	1
7	26946111	26946313	203	Yes	1
7	27042398	27042773	376	Yes	0
7	27056639	27056918	280	Yes	2
7	27210989	27211285	297	Yes	1
7	27267824	27267986	163	No	0
7	27420273	27420602	330	Yes	3
7	27573229	27573570	342	Yes	2
7	27888699	27888939	241	No	2
7	28280717	28281000	284	Yes	1
7	28402612	28402809	198	Yes	1
7	28403960	28404126	167	Yes	0
7	28408209	28408493	285	Yes	1
7	28428149	28428402	254	Yes	1
7	28501243	28501528	286	Yes	2
7	28510606	28510891	286	Yes	1
7	28556808	28557019	212	Yes	1
7	28627397	28627584	188	No	0
7	28655421	28655581	161	Yes	2
7	28704769	28704890	122	No	0
7	28936724	28937019	296	Yes	2
7	28982091	28982216	126	Yes	0
7	29042426	29042722	297	Yes	1
7	29289685	29289919	235	Yes	0
7	29362659	29362981	323	Yes	3
7	29401371	29401613	243	Yes	1
7	29402000	29402179	180	Yes	2
7	29454462	29454786	325	Yes	1
7	29621128	29621331	204	Yes	1
7	29645667	29645947	281	Yes	1
7	29648349	29648667	319	Yes	1
7	29716389	29716705	317	Yes	2
7	29755553	29755773	221	No	1
7	29787276	29787566	291	Yes	2
7	29848938	29849111	174	No	1
7	29861679	29861944	266	Yes	1
7	29920550	29920871	322	Yes	1
7	29930530	29930881	352	Yes	1
7	29976049	29976158	110	No	0
7	29976504	29976689	186	No	1
7	30045361	30045565	205	Yes	2
8	178569	178898	330	Yes	1
8	249155	249292	138	No	0
8	283974	284212	239	Yes	2
8	417359	417507	149	No	0
8	457317	457679	363	No	1
8	700766	701022	257	Yes	0
8	749871	750060	190	Yes	1
8	900104	900371	268	Yes	1
8	961262	961530	269	Yes	1
8	1085706	1085999	294	Yes	3
8	1524065	1524279	215	Yes	1
8	1540090	1540243	154	Yes	2
8	1714233	1714440	208	Yes	1
8	1823964	1824131	168	No	2
8	1966163	1966273	111	Yes	0
8	2388376	2388531	156	No	0
8	2404826	2404992	167	Yes	0
8	2593907	2594167	261	Yes	2
8	2805953	2806234	282	Yes	1
8	2858447	2858727	281	Yes	1
8	3149257	3149523	267	No	2
8	3233009	3233229	221	Yes	2
8	3241199	3241479	281	Yes	2
8	3350010	3350303	294	No	2
8	3352202	3352466	265	Yes	0
8	3374305	3374604	300	Yes	1
8	3457769	3457865	97	Yes	0
8	3463315	3463661	347	Yes	2
8	3679639	3679829	191	No	1
8	3680789	3680974	186	No	1
8	3819144	3819296	153	Yes	1
8	3959248	3959547	300	Yes	1
8	4002555	4002849	295	Yes	2
8	4037311	4037665	355	Yes	2
8	4050146	4050247	102	No	0
8	4064184	4064504	321	Yes	1
8	4313206	4313409	204	Yes	0
8	4430208	4430342	135	No	1
8	4505979	4506279	301	Yes	1
8	4507295	4507494	200	Yes	0
8	4509039	4509292	254	Yes	2
8	4509441	4509795	355	Yes	0
8	4662404	4662719	316	Yes	2
8	4725010	4725329	320	Yes	4
8	4729257	4729444	188	No	2
8	4782462	4782677	216	Yes	1
8	4805602	4805740	139	Yes	0
8	4851153	4851384	232	No	0
8	5009259	5009405	147	Yes	0
8	5035192	5035505	314	Yes	2
8	5133206	5133422	217	Yes	0
8	5273676	5273956	281	Yes	2
8	5404950	5405290	341	Yes	0
8	5431530	5431869	340	Yes	2
8	5591581	5591860	280	Yes	1
8	6066128	6066229	102	No	0
8	6157790	6158034	245	Yes	1
8	6192941	6193102	162	Yes	0
8	6263200	6263461	262	Yes	0
8	6764664	6764955	292	Yes	0
8	6837037	6837285	249	Yes	2
8	6883312	6883663	352	Yes	5
8	6890340	6890505	166	No	0
8	6947199	6947398	200	No	4
8	6954592	6954919	328	Yes	0
8	6958891	6959216	326	Yes	0
8	6963187	6963463	277	Yes	4
8	6969811	6970071	261	Yes	4
8	7070673	7070912	240	Yes	4
8	7358343	7358538	196	Yes	1
8	7384402	7384774	373	Yes	6
8	7462875	7463114	240	Yes	2
8	7464753	7464963	211	Yes	2
8	7565066	7565438	373	Yes	3
8	7597561	7597876	316	Yes	3
8	7702300	7702504	205	Yes	0
8	7778149	7778316	168	Yes	0
8	8007023	8007321	299	Yes	2
8	8017358	8017629	272	Yes	2
8	8262508	8262855	348	Yes	2
8	8361458	8361752	295	Yes	2
8	8713644	8714020	377	Yes	5
8	8717335	8717544	210	Yes	1
8	9032465	9032744	280	Yes	1
8	9086027	9086368	342	Yes	3
8	9091290	9091476	187	Yes	1
8	9096315	9096512	198	Yes	1
8	9164826	9164970	145	No	1
8	9282609	9282887	279	No	0
8	9285115	9285371	257	Yes	1
8	9456245	9456540	296	Yes	0
8	10015511	10015727	217	No	2
[truncated: 765 more rows]
