# Supplementary material for: Identification of Target Genes of the bZIP Transcription Factor OsTGAP1, Whose Overexpression Causes Elicitor-Induced Hyperaccumulation of Diterpenoid Phytoalexins in Rice Cells
Source: PLoS One. 2014 Aug 26;9(8):e105823. doi: 10.1371/journal.pone.0105823 (PMC4144896; doi:10.1371/journal.pone.0105823)
Supplement: Table S4 — List of OsTGAP1-binding regions in elicitor-treated condition. (XLSX) [file pone.0105823.s010.xlsx]

## Sheet: Table S4
Table S4. List of OsTGAP1-binding regions in elicitor-treated condition.
Chr No.	Start	End	Length (bp)	OsTGAP1 binding in untreated condition	Number of TGACGT sequence in each region
1	100747	101007	261	Yes	2
1	106863	107094	232	Yes	2
1	115337	115553	217	Yes	2
1	133210	133446	237	Yes	2
1	172865	173044	180	Yes	1
1	449266	449434	169	Yes	1
1	452459	452731	273	Yes	1
1	494718	494979	262	Yes	1
1	657623	657952	330	Yes	1
1	796923	797192	270	Yes	1
1	1115891	1116141	251	Yes	1
1	1126342	1126451	110	Yes	0
1	1577086	1577353	268	Yes	0
1	1648116	1648227	112	No	0
1	1676136	1676390	255	Yes	1
1	1678881	1679025	145	No	0
1	1686942	1687153	212	Yes	1
1	1688951	1689279	329	Yes	2
1	1748883	1749181	299	Yes	2
1	1791886	1791955	70	No	1
1	1866656	1866901	246	Yes	1
1	1939634	1939764	131	No	1
1	1975125	1975412	288	Yes	1
1	2052103	2052481	379	Yes	1
1	2057871	2058171	301	Yes	1
1	2065864	2065963	100	No	0
1	2077296	2077499	204	Yes	2
1	2095688	2095893	206	No	1
1	2178716	2178959	244	Yes	1
1	2207202	2207373	172	No	0
1	2485065	2485357	293	Yes	2
1	2491081	2491212	132	No	1
1	2539880	2540444	565	Yes	4
1	2548086	2548284	199	Yes	2
1	2548983	2549119	137	Yes	2
1	2622187	2622434	248	Yes	2
1	2631441	2631608	168	Yes	2
1	2789365	2789562	198	No	1
1	2844156	2844505	350	Yes	3
1	2857139	2857390	252	Yes	2
1	2870850	2871120	271	Yes	2
1	2917879	2918294	416	Yes	3
1	3113599	3113881	283	Yes	2
1	3140389	3140566	178	Yes	0
1	3372916	3373108	193	Yes	1
1	3428870	3429140	271	Yes	2
1	3430219	3430451	233	Yes	1
1	3508920	3509138	219	No	0
1	3516535	3516671	137	Yes	0
1	3786015	3786203	189	Yes	1
1	3787417	3787634	218	Yes	1
1	3789006	3789286	281	Yes	0
1	3899236	3899499	264	Yes	1
1	3915277	3915580	304	Yes	1
1	3916848	3917068	221	Yes	1
1	4030940	4031090	151	No	1
1	4089889	4090049	161	No	0
1	4339607	4339948	342	Yes	2
1	4413977	4414258	282	Yes	1
1	4456851	4457104	254	Yes	1
1	4528408	4528781	374	Yes	3
1	4529234	4529457	224	Yes	0
1	4635901	4636216	316	Yes	1
1	4645042	4645420	379	Yes	3
1	4824270	4824562	293	Yes	2
1	4873089	4873370	282	Yes	0
1	4912762	4912979	218	Yes	1
1	5084595	5084861	267	Yes	2
1	5285999	5286229	231	Yes	2
1	5500788	5501082	295	Yes	0
1	5631426	5631663	238	Yes	0
1	5833913	5834211	299	Yes	0
1	6392766	6393010	245	No	0
1	6468655	6468926	272	Yes	0
1	6602647	6602876	230	Yes	2
1	7108107	7108389	283	Yes	0
1	7227970	7228277	308	No	0
1	7240977	7241206	230	Yes	1
1	7280723	7281002	280	Yes	1
1	7501553	7501986	434	Yes	2
1	7533055	7533327	273	Yes	2
1	7815986	7816357	372	Yes	0
1	8797403	8797704	302	No	0
1	8952386	8952753	368	Yes	2
1	9638033	9638360	328	Yes	1
1	10518111	10518486	376	Yes	2
1	10668991	10669327	337	Yes	2
1	10987239	10987531	293	No	1
1	19427197	19427526	330	Yes	0
1	19794210	19794512	303	Yes	0
1	20317130	20317553	424	No	1
1	20319815	20320163	349	No	0
1	21457456	21457896	441	Yes	0
1	22338558	22338885	328	Yes	0
1	23077793	23078156	364	Yes	0
1	23261455	23261847	393	Yes	0
1	23961917	23962266	350	Yes	0
1	24601858	24602281	424	No	0
1	29061735	29062064	330	Yes	0
1	30167077	30167380	304	Yes	1
1	30533792	30534084	293	No	0
1	30550541	30550909	369	Yes	0
1	30992867	30993213	347	Yes	0
1	31828476	31828796	321	No	0
1	32198949	32199270	322	No	0
1	32914908	32915311	404	Yes	0
1	33058711	33059059	349	No	0
1	33298973	33299304	332	Yes	0
1	35228371	35228879	509	No	0
1	35248058	35248434	377	No	0
1	35248689	35249101	413	No	0
1	35252893	35253301	409	No	0
1	35269638	35270004	367	No	0
1	35312169	35312495	327	No	0
1	35313052	35313596	545	No	0
1	35314331	35315029	699	No	0
1	35317948	35318296	349	No	0
1	35686088	35686356	269	No	0
1	35762581	35762897	317	Yes	0
1	35765433	35765751	319	Yes	0
1	36083603	36083886	284	Yes	0
1	36759622	36759993	372	Yes	0
1	36825410	36825681	272	Yes	0
1	37206666	37207026	361	Yes	0
1	37507236	37507511	276	Yes	1
1	37730544	37730841	298	No	0
1	37769129	37769305	177	No	0
1	37824155	37824499	345	Yes	0
1	38689376	38689668	293	Yes	0
1	38891308	38891529	222	No	0
1	39004841	39005161	321	Yes	0
1	39383666	39383910	245	No	0
1	39444603	39444889	287	Yes	0
1	39492857	39493058	202	No	0
1	39666193	39666584	392	Yes	0
1	39667511	39667714	204	No	0
1	39760659	39760899	241	No	0
1	39808747	39808963	217	No	0
1	39872331	39872596	266	Yes	0
1	39913864	39914127	264	No	0
1	40091786	40092057	272	Yes	0
1	40131172	40131522	351	Yes	1
1	40217060	40217319	260	Yes	0
1	40365511	40365763	253	No	0
1	40367855	40368142	288	Yes	0
1	40424772	40424994	223	No	0
1	40651910	40652139	230	Yes	0
1	40664692	40665001	310	Yes	0
1	40808123	40808370	248	Yes	0
1	40841238	40841533	296	No	0
1	40846696	40847196	501	No	0
1	40850461	40850681	221	No	0
1	40851900	40852237	338	No	0
1	40855511	40855657	147	No	0
1	40855955	40856192	238	No	0
1	41068183	41068348	166	Yes	0
1	41081073	41081390	318	No	0
1	41162494	41162693	200	Yes	0
1	41270631	41270947	317	Yes	0
1	41422508	41422775	268	Yes	0
1	41457167	41457530	364	Yes	0
1	41605502	41605693	192	Yes	0
1	41605834	41606018	185	No	0
1	41660028	41660244	217	Yes	0
1	41728745	41728941	197	Yes	0
1	41756252	41756352	101	Yes	0
1	41796508	41796851	344	Yes	0
1	41806655	41806918	264	Yes	0
1	41921208	41921517	310	Yes	0
1	42010931	42011125	195	Yes	0
1	42093792	42094086	295	Yes	0
1	42139679	42139903	225	Yes	0
1	42165955	42166119	165	Yes	1
1	42323570	42323777	208	Yes	0
1	42547023	42547195	173	No	1
1	42567890	42568065	176	Yes	0
1	42591192	42591468	277	Yes	0
1	42601356	42601549	194	Yes	0
1	42674248	42674361	114	Yes	0
1	42828326	42828581	256	Yes	0
1	42863084	42863253	170	No	0
1	42891976	42892077	102	No	0
1	43110919	43111239	321	Yes	0
1	43320233	43320346	114	Yes	0
1	43332232	43332521	290	Yes	0
1	43467627	43467924	298	Yes	0
1	43496011	43496231	221	Yes	0
1	43569099	43569355	257	No	0
1	43574243	43574534	292	Yes	0
1	43583974	43584129	156	No	0
1	43610036	43610371	336	Yes	1
1	43716870	43717157	288	Yes	1
1	43782218	43782388	171	Yes	0
1	43787169	43787378	210	Yes	0
1	43793786	43794266	481	Yes	0
1	43838452	43838631	180	Yes	0
1	43839659	43839906	248	No	0
1	43845428	43845555	128	No	0
1	43853905	43854191	287	Yes	0
1	43881458	43881878	421	No	0
1	43891182	43891428	247	Yes	0
1	44086470	44086750	281	Yes	0
1	44117639	44117767	129	No	0
1	44159737	44160308	572	Yes	0
1	44525901	44526111	211	Yes	0
1	44527432	44527680	249	Yes	0
1	44597872	44598074	203	Yes	0
1	44702523	44702747	225	Yes	0
1	44845299	44845568	270	Yes	0
1	44853475	44853686	212	Yes	0
1	44875185	44875425	241	Yes	0
2	216485	216723	239	Yes	2
2	224403	224692	290	Yes	2
2	418986	419127	142	Yes	2
2	485316	485465	150	Yes	0
2	653979	654161	183	No	1
2	890049	890230	182	Yes	0
2	943932	944221	290	Yes	0
2	1015940	1016261	322	Yes	0
2	1024825	1025090	266	Yes	1
2	1031806	1031953	148	No	1
2	1067032	1067144	113	Yes	1
2	1134370	1134692	323	Yes	1
2	1186384	1186578	195	Yes	1
2	1206431	1206653	223	Yes	1
2	1276650	1276829	180	Yes	2
2	1344471	1344693	223	Yes	1
2	1446859	1447168	310	Yes	3
2	1480599	1480877	279	Yes	1
2	1559203	1559372	170	No	0
2	1612926	1613176	251	Yes	2
2	1615715	1616004	290	Yes	0
2	1729811	1729949	139	Yes	0
2	1838780	1838920	141	Yes	2
2	2095946	2096239	294	Yes	2
2	2124960	2125275	316	Yes	1
2	2146403	2146578	176	Yes	2
2	2294404	2294685	282	Yes	4
2	2392387	2392943	557	No	0
2	2605391	2605611	221	Yes	2
2	2698645	2698803	159	Yes	0
2	2750471	2750710	240	Yes	1
2	2862372	2862488	117	Yes	0
2	2919162	2919363	202	Yes	2
2	3064498	3064625	128	No	0
2	3343576	3343828	253	Yes	1
2	3500088	3500303	216	Yes	1
2	3544103	3544303	201	Yes	2
2	3545895	3546059	165	Yes	1
2	3553134	3553397	264	Yes	0
2	3577389	3577594	206	Yes	1
2	3637494	3637827	334	Yes	2
2	3658941	3659102	162	Yes	2
2	3959877	3960166	290	Yes	1
2	3973695	3973877	183	Yes	1
2	4005695	4005970	276	Yes	2
2	4024533	4024757	225	Yes	0
2	4109495	4109736	242	Yes	1
2	4176156	4176418	263	Yes	2
2	4179494	4179676	183	Yes	3
2	4278563	4278881	319	Yes	4
2	4300295	4300635	341	Yes	2
2	4312095	4312395	301	Yes	1
2	4558252	4558470	219	Yes	0
2	4618046	4618300	255	Yes	1
2	4762643	4762789	147	No	0
2	4817191	4817443	253	No	2
2	4875993	4876287	295	Yes	4
2	4999730	5000010	281	Yes	0
2	5092813	5093030	218	Yes	2
2	5154473	5154667	195	Yes	2
2	5162083	5162409	327	Yes	1
2	5280004	5280291	288	Yes	3
2	5357174	5357419	246	Yes	1
2	5380074	5380345	272	Yes	2
2	5651856	5652106	251	Yes	0
2	5662306	5662541	236	Yes	2
2	5703608	5703830	223	Yes	1
2	5749526	5749808	283	Yes	3
2	5780186	5780373	188	Yes	0
2	5934263	5934486	224	No	0
2	6025496	6025752	257	Yes	2
2	6175689	6176098	410	Yes	1
2	6525690	6525951	262	Yes	1
2	6526954	6527255	302	Yes	1
2	6553750	6553951	202	Yes	1
2	6654166	6654368	203	Yes	1
2	6705602	6705855	254	Yes	0
2	6713514	6713753	240	Yes	2
2	6775477	6775767	291	Yes	2
2	7008000	7008291	292	Yes	1
2	7166986	7167247	262	Yes	1
2	7373320	7373582	263	Yes	1
2	7390654	7390889	236	Yes	2
2	7495319	7495573	255	Yes	1
2	7520025	7520298	274	Yes	0
2	7623844	7623944	101	Yes	0
2	8020489	8020817	329	Yes	1
2	8198566	8198831	266	Yes	0
2	8519092	8519376	285	Yes	2
2	8768804	8769179	376	Yes	3
2	8966169	8966482	314	Yes	2
2	9020271	9020574	304	Yes	2
2	9144950	9145166	217	Yes	1
2	9469281	9469546	266	Yes	1
2	9854537	9854877	341	Yes	5
2	10113116	10113359	244	Yes	1
2	10685567	10685944	378	Yes	3
2	11098515	11098766	252	Yes	0
2	11547860	11548142	283	Yes	2
2	11613741	11613996	256	Yes	0
2	12433008	12433335	328	Yes	2
2	12668803	12669158	356	Yes	1
2	12764035	12764300	266	Yes	2
2	13346837	13347099	263	Yes	1
2	16170310	16170610	301	Yes	0
2	16444892	16445207	316	Yes	0
2	17424780	17425058	279	Yes	0
2	17425932	17426236	305	Yes	0
2	17431841	17432107	267	Yes	0
2	17449869	17450196	328	Yes	0
2	17451543	17451823	281	Yes	0
2	18786889	18787191	303	Yes	0
2	18983827	18984067	241	Yes	0
2	19143364	19143563	200	Yes	0
2	19168518	19168860	343	Yes	0
2	19811147	19811459	313	Yes	0
2	19932489	19932815	327	Yes	0
2	20140081	20140394	314	Yes	0
2	20311437	20311681	245	Yes	0
2	20799928	20800284	357	Yes	1
2	20907343	20907618	276	Yes	0
2	21835705	21835974	270	Yes	1
2	21923281	21923543	263	Yes	0
2	22545516	22545738	223	Yes	0
2	22755926	22756178	253	Yes	0
2	22776176	22776459	284	Yes	0
2	22892577	22892922	346	Yes	0
2	24073894	24074080	187	No	0
2	24386741	24386924	184	Yes	0
2	24420205	24420568	364	Yes	0
2	24472837	24473184	348	Yes	0
2	24911698	24912016	319	Yes	0
2	25113704	25113948	245	Yes	0
2	25493839	25494035	197	Yes	0
2	25784902	25785214	313	Yes	0
2	26394142	26394439	298	Yes	0
2	26925828	26926099	272	Yes	0
2	26978191	26978474	284	Yes	0
2	27343202	27343511	310	Yes	0
2	27356034	27356337	304	Yes	0
2	27516820	27517062	243	Yes	0
2	27783213	27783521	309	Yes	0
2	28709592	28709881	290	Yes	0
2	29026282	29026511	230	Yes	0
2	29323318	29323569	252	Yes	0
2	29828166	29828440	275	Yes	0
2	29897998	29898237	240	Yes	0
2	29906467	29906722	256	Yes	0
2	29932941	29933177	237	Yes	0
2	29933225	29933232	8	No	0
2	29933261	29933553	293	Yes	0
2	29968771	29969124	354	Yes	0
2	30123131	30123406	276	Yes	0
2	30139870	30140085	216	Yes	0
2	30246665	30246919	255	Yes	0
2	30371864	30372087	224	Yes	0
2	30381392	30381507	116	No	0
2	30646714	30646908	195	Yes	0
2	30668490	30668698	209	No	0
2	30957586	30957866	281	Yes	0
2	31177395	31177637	243	Yes	0
2	31305588	31305726	139	Yes	0
2	31606137	31606426	290	Yes	0
2	31672263	31672410	148	No	0
2	31772792	31773163	372	Yes	0
2	31899664	31899865	202	Yes	0
2	31919512	31919848	337	Yes	0
2	32066063	32066253	191	Yes	0
2	32220750	32221054	305	Yes	0
2	32293976	32294232	257	Yes	0
2	32311772	32312002	231	No	0
2	32506877	32506957	81	No	0
2	32550420	32550666	247	Yes	0
2	32556506	32556678	173	No	0
2	32636042	32636265	224	No	0
2	32653146	32653318	173	Yes	0
2	32662495	32662817	323	No	0
2	32669376	32669516	141	No	0
2	32707234	32707396	163	No	0
2	32804305	32804482	178	Yes	0
2	32828070	32828317	248	Yes	0
2	33016223	33016429	207	Yes	0
2	33129645	33129844	200	Yes	0
2	33193357	33193588	232	Yes	0
2	33252193	33252377	185	Yes	0
2	33314224	33314506	283	Yes	0
2	33324630	33324858	229	Yes	0
2	33373208	33373413	206	Yes	0
2	33429747	33429987	241	Yes	0
2	33436746	33436976	231	Yes	0
2	33437133	33437336	204	No	0
2	33531604	33531776	173	No	0
2	33538414	33538718	305	Yes	0
2	33539695	33540007	313	Yes	0
2	33693484	33693692	209	Yes	0
2	33694812	33694966	155	No	0
2	33784925	33785112	188	No	0
2	33789697	33789964	268	Yes	0
2	33852449	33852742	294	Yes	0
2	33853826	33853972	147	Yes	0
2	33964277	33964535	259	Yes	0
2	34033281	34033361	81	Yes	1
2	34062438	34062545	108	No	0
2	34308777	34309022	246	Yes	0
2	34419624	34419738	115	No	0
2	34466062	34466261	200	No	0
2	34585383	34585692	310	Yes	0
2	34684928	34685127	200	Yes	1
2	34903424	34903533	110	No	0
2	34910900	34911112	213	Yes	0
2	34913984	34914170	187	Yes	0
2	35065701	35065917	217	Yes	0
2	35119693	35119929	237	Yes	0
2	35330126	35330421	296	Yes	0
2	35565377	35565578	202	Yes	0
2	35597018	35597180	163	No	0
2	35619741	35619841	101	Yes	0
2	35650163	35650299	137	Yes	0
2	35732230	35732440	211	No	0
2	35757499	35757595	97	No	0
2	35941763	35942068	306	Yes	0
2	36042427	36042748	322	Yes	0
2	36104524	36104789	266	Yes	0
2	36227329	36227589	261	Yes	0
2	36279754	36279958	205	No	1
2	36426638	36426738	101	No	1
2	36440744	36440854	111	Yes	0
2	36443700	36443949	250	Yes	0
2	36519446	36519666	221	Yes	0
3	22977	23298	322	Yes	0
3	124036	124277	242	Yes	0
3	475958	476180	223	Yes	0
3	709409	709730	322	Yes	0
3	899302	899522	221	Yes	0
3	956810	957058	249	Yes	0
3	993760	993994	235	Yes	0
3	1030657	1030912	256	Yes	0
3	1047587	1047897	311	Yes	0
3	1079474	1079725	252	Yes	0
3	1134122	1134466	345	Yes	0
3	1243948	1244064	117	Yes	0
3	1351031	1351350	320	Yes	0
3	1354258	1354532	275	Yes	0
3	1425608	1425789	182	No	0
3	1512212	1512470	259	Yes	0
3	1536851	1536902	52	No	0
3	1615965	1616154	190	No	0
3	1646332	1646633	302	Yes	0
3	1665847	1665991	145	Yes	0
3	1693399	1693533	135	No	0
3	1729787	1729995	209	Yes	0
3	1742571	1742637	67	Yes	0
3	1769340	1769571	232	Yes	0
3	1770558	1771008	451	Yes	0
3	1834423	1834540	118	Yes	0
3	1871056	1871313	258	Yes	0
3	2115871	2116178	308	Yes	0
3	2224620	2224874	255	Yes	0
3	2250257	2250476	220	Yes	0
3	2366133	2366285	153	No	0
3	2482587	2482718	132	Yes	0
3	2525135	2525286	152	Yes	0
3	2565184	2565369	186	No	0
3	2566579	2566846	268	Yes	0
3	2669505	2669794	290	Yes	0
3	2768069	2768344	276	Yes	0
3	2813752	2813910	159	No	0
3	2867312	2867623	312	Yes	0
3	2867976	2868095	120	Yes	1
3	2960543	2960763	221	Yes	0
3	2970090	2970351	262	Yes	0
3	2992409	2992574	166	Yes	0
3	3109042	3109345	304	Yes	0
3	3132312	3132558	247	Yes	0
3	3185048	3185382	335	Yes	0
3	3197289	3197471	183	No	0
3	3486441	3486573	133	Yes	0
3	3565510	3565699	190	Yes	1
3	3661002	3661036	35	No	0
3	3923766	3924003	238	Yes	0
3	4067028	4067337	310	Yes	0
3	4139135	4139246	112	Yes	0
3	4164459	4164734	276	Yes	0
3	4199826	4200096	271	Yes	0
3	4317616	4317838	223	Yes	0
3	4349535	4349753	219	Yes	0
3	4568692	4568899	208	No	0
3	4591242	4591506	265	Yes	0
3	4656337	4656648	312	Yes	1
3	4668112	4668398	287	Yes	0
3	4678498	4678598	101	No	0
3	4833876	4834094	219	Yes	0
3	4843903	4844067	165	Yes	0
3	4950131	4950396	266	Yes	0
3	5114453	5114709	257	Yes	0
3	5191167	5191469	303	Yes	0
3	5227994	5228151	158	No	0
3	5306267	5306501	235	Yes	0
3	5488560	5488743	184	No	0
3	5524458	5524629	172	Yes	0
3	5526071	5526266	196	Yes	0
3	6039849	6040146	298	Yes	0
3	6288363	6288623	261	No	0
3	6364869	6365054	186	No	0
3	6386062	6386302	241	Yes	0
3	6418717	6418984	268	Yes	0
3	6491713	6491978	266	Yes	0
3	6526880	6527244	365	Yes	0
3	6578663	6578933	271	Yes	0
3	6584839	6585047	209	Yes	0
3	6660672	6660969	298	Yes	0
3	6778805	6779007	203	Yes	0
3	6801951	6802281	331	Yes	0
3	7070483	7070714	232	Yes	0
3	7656330	7656559	230	Yes	0
3	7658141	7658389	249	Yes	0
3	7785180	7785421	242	Yes	0
3	8434285	8434520	236	Yes	0
3	9095362	9095485	124	No	0
3	9165272	9165589	318	Yes	0
3	9302538	9302746	209	Yes	0
3	9371224	9371470	247	Yes	0
3	9482734	9483019	286	Yes	0
3	9690286	9690637	352	Yes	0
3	9762848	9763120	273	Yes	0
3	9877627	9877927	301	Yes	0
3	9879697	9879946	250	Yes	0
3	9899627	9899947	321	Yes	0
3	9955155	9955396	242	Yes	0
3	10532060	10532338	279	Yes	0
3	10630591	10630889	299	Yes	0
3	10651639	10651882	244	Yes	0
3	10695468	10695752	285	Yes	0
3	10862029	10862325	297	Yes	0
3	11141016	11141376	361	Yes	0
3	11217676	11217947	272	Yes	0
3	11690066	11690387	322	Yes	0
3	11984266	11984538	273	Yes	1
3	12032018	12032348	331	Yes	0
3	12077646	12077937	292	Yes	0
3	12442109	12442463	355	Yes	1
3	12694815	12695133	319	Yes	0
3	12968033	12968242	210	Yes	0
3	13205268	13205578	311	Yes	0
3	14189646	14189960	315	No	0
3	14190549	14190897	349	No	0
3	14783431	14783757	327	Yes	0
3	15590247	15590605	359	Yes	0
3	17218092	17218396	305	Yes	0
3	17244431	17244721	291	No	0
3	18793652	18793956	305	Yes	0
3	19114614	19114905	292	Yes	0
3	21626635	21626950	316	Yes	0
3	21702733	21702989	257	Yes	0
3	23882362	23882665	304	No	0
3	24568140	24568412	273	No	0
3	24752734	24753040	307	Yes	0
3	25816454	25816704	251	Yes	0
3	26417594	26417909	316	Yes	0
3	27078155	27078531	377	Yes	0
3	27989014	27989298	285	Yes	0
3	28146347	28146651	305	No	1
3	28554644	28555015	372	Yes	0
3	29529004	29529518	515	No	0
3	30388805	30389064	260	No	0
3	31217395	31217709	315	Yes	0
3	31296216	31296529	314	Yes	0
3	31333477	31333769	293	Yes	0
3	31410510	31410753	244	No	0
3	31416062	31416366	305	Yes	0
3	32506336	32506619	284	No	0
3	32592885	32593160	276	Yes	0
3	32654161	32654502	342	Yes	0
3	32713102	32713435	334	No	0
3	32714226	32714562	337	No	0
3	32718217	32718590	374	No	0
3	32827884	32828109	226	Yes	0
3	32836247	32836563	317	Yes	0
3	33142448	33142711	264	Yes	0
3	33264063	33264258	196	No	0
3	33463573	33463881	309	Yes	0
3	33519418	33519663	246	Yes	0
3	33543350	33543615	266	Yes	1
3	33613389	33613575	187	No	0
3	33707264	33707520	257	No	0
3	33834283	33834623	341	Yes	0
3	33882871	33883063	193	Yes	0
3	33883159	33883287	129	Yes	0
3	33892048	33892219	172	Yes	0
3	33923041	33923209	169	No	0
3	33973782	33973980	199	No	0
3	34079258	34079485	228	No	0
3	34111680	34111849	170	No	2
3	34128842	34129191	350	Yes	0
3	34131208	34131475	268	No	0
3	34146108	34146383	276	Yes	0
3	34379531	34379765	235	Yes	0
3	34380503	34380617	115	No	0
3	34449696	34449867	172	Yes	0
3	34466537	34466807	271	Yes	0
3	34516287	34516587	301	Yes	0
3	34549287	34549394	108	No	0
3	34549404	34549448	45	No	0
3	34582877	34583072	196	Yes	0
3	34673258	34673589	332	Yes	0
3	34822845	34822996	152	Yes	0
3	34836642	34836779	138	Yes	0
3	35028150	35028475	326	Yes	0
3	35064267	35064610	344	Yes	0
3	35155757	35156051	295	Yes	0
3	35225395	35225689	295	Yes	0
3	35318038	35318356	319	Yes	0
3	35322383	35322638	256	Yes	0
3	35325287	35325517	231	Yes	0
3	35414143	35414249	107	No	0
3	35414573	35414871	299	No	0
3	35419576	35419869	294	Yes	0
3	35470201	35470347	147	Yes	0
3	35578410	35578531	122	No	0
3	35639744	35640050	307	Yes	0
3	35671093	35671349	257	No	0
3	35713876	35714172	297	Yes	0
3	35998829	35998976	148	Yes	0
3	36011067	36011227	161	No	0
3	36035862	36036025	164	No	0
3	36083116	36083293	178	Yes	0
3	36139038	36139258	221	Yes	0
3	36149385	36149618	234	Yes	0
3	36322236	36322404	169	Yes	0
3	36424926	36425256	331	Yes	0
3	36551233	36551368	136	No	0
3	36566525	36566641	117	Yes	0
3	36786776	36786998	223	Yes	0
3	36819280	36819559	280	Yes	0
3	37095790	37095999	210	Yes	0
3	37199671	37199929	259	Yes	0
4	112114	112348	235	Yes	0
4	211580	211700	121	No	0
4	409532	409742	211	Yes	1
4	1110074	1110368	295	Yes	0
4	1163740	1163880	141	Yes	1
4	1430628	1430760	133	Yes	0
4	1853315	1853484	170	Yes	0
4	1909232	1909496	265	Yes	0
4	2211999	2212376	378	Yes	0
4	2484973	2485155	183	Yes	0
4	2625770	2625972	203	Yes	0
4	2637859	2638068	210	Yes	0
4	2718955	2719134	180	Yes	0
4	3407939	3408216	278	Yes	0
4	3460503	3460815	313	Yes	0
4	3566345	3566535	191	No	0
4	3811026	3811256	231	Yes	0
4	3896691	3897009	319	Yes	0
4	4125447	4125550	104	Yes	0
4	4501352	4501573	222	Yes	0
4	4548048	4548177	130	Yes	0
4	5255534	5255772	239	Yes	0
4	5470435	5470603	169	No	0
4	5514174	5514390	217	Yes	0
4	5656837	5656946	110	Yes	0
4	6271209	6271418	210	Yes	0
4	6457507	6457680	174	Yes	0
4	6562927	6563031	105	No	0
4	7304911	7305108	198	Yes	0
4	7412046	7412368	323	Yes	1
4	7636689	7636935	247	Yes	0
4	8183262	8183498	237	Yes	0
4	8310189	8310353	165	No	0
4	8323817	8324170	354	Yes	0
4	8734050	8734319	270	Yes	1
4	8738488	8738708	221	Yes	0
4	8760085	8760388	304	Yes	0
4	9148563	9148889	327	No	0
4	9165022	9165281	260	No	0
4	9174433	9174707	275	No	0
4	9176948	9177389	442	No	0
4	9177806	9177921	116	No	0
4	9190739	9190906	168	No	0
4	9195740	9196023	284	No	0
4	9209805	9210324	520	No	0
4	9213330	9213607	278	No	0
4	9219004	9219421	418	No	0
4	9219502	9219638	137	No	0
4	9219707	9219900	194	No	0
4	9235081	9235403	323	No	0
4	9250877	9251369	493	No	0
4	9256825	9257177	353	No	0
4	9396706	9397231	526	No	1
4	9400220	9400525	306	No	0
4	9405912	9406354	443	No	0
4	9406445	9406548	104	No	0
4	9421977	9422302	326	No	0
4	9437773	9438245	473	No	0
4	9443738	9444089	352	No	0
4	9454214	9454475	262	No	0
4	9459873	9460274	402	No	1
4	9465837	9466187	351	No	0
4	9525097	9525333	237	No	0
4	9603926	9604237	312	Yes	0
4	9936164	9936472	309	No	1
4	10870859	10871103	245	No	0
4	11227106	11227392	287	No	0
4	11600228	11600535	308	Yes	0
4	13651734	13652102	369	Yes	0
4	13968737	13969060	324	Yes	0
4	14086473	14086759	287	Yes	0
4	14407397	14407691	295	Yes	0
4	14989305	14989665	361	Yes	1
4	16511980	16512242	263	No	0
4	16647940	16648243	304	Yes	0
4	16655347	16655649	303	No	0
4	16905000	16905160	161	No	0
4	18479111	18479356	246	No	0
4	19366925	19367152	228	Yes	0
4	19391715	19392017	303	Yes	0
4	19498153	19498449	297	Yes	0
4	19872400	19872660	261	Yes	0
4	20084118	20084381	264	Yes	0
4	20125940	20126221	282	Yes	0
4	20259196	20259481	286	No	0
4	20862922	20863188	267	No	0
4	21480478	21480698	221	No	0
4	22739903	22740236	334	Yes	0
4	22826573	22826856	284	No	0
4	22942868	22943149	282	No	0
4	23029054	23029392	339	Yes	0
4	23330838	23331146	309	Yes	0
4	23381692	23381979	288	No	0
4	23601731	23602040	310	Yes	0
4	23883314	23883588	275	No	0
4	23912145	23912477	333	Yes	0
4	24197278	24197555	278	Yes	0
4	24296919	24297190	272	Yes	0
4	24348228	24348534	307	Yes	0
4	24478718	24478990	273	Yes	0
4	24611039	24611321	283	Yes	0
4	24616984	24617277	294	Yes	0
4	24638808	24639038	231	Yes	0
4	24785124	24785437	314	Yes	0
4	24908520	24908866	347	Yes	0
4	25114493	25114749	257	Yes	0
4	25159363	25159681	319	Yes	0
4	25361345	25361612	268	Yes	0
4	25778144	25778451	308	Yes	0
4	25994768	25995062	295	Yes	0
4	26001181	26001432	252	Yes	0
4	26353219	26353530	312	Yes	0
4	26714915	26715234	320	Yes	0
4	26739773	26740060	288	Yes	0
4	26796073	26796277	205	No	0
4	26886391	26886696	306	Yes	0
4	26893368	26893630	263	Yes	0
4	26950756	26951029	274	Yes	0
4	27074991	27075270	280	Yes	0
4	27424272	27424546	275	Yes	0
4	27676704	27677009	306	Yes	0
4	27708079	27708338	260	Yes	0
4	28143293	28143617	325	Yes	0
4	28197469	28197754	286	Yes	0
4	28343299	28343518	220	Yes	0
4	28349581	28349873	293	Yes	0
4	28721048	28721388	341	Yes	0
4	29390300	29390528	229	Yes	0
4	29408653	29408878	226	Yes	0
4	29554996	29555198	203	No	0
4	29806188	29806464	277	Yes	0
4	29841626	29841943	318	Yes	0
4	30005766	30006093	328	Yes	0
4	30029430	30029592	163	No	0
4	30108206	30108507	302	Yes	0
4	30123003	30123143	141	No	0
4	30161309	30161580	272	Yes	0
4	30262893	30262990	98	Yes	0
4	30262991	30263207	217	Yes	0
4	30656268	30656448	181	No	0
4	30717576	30717866	291	Yes	0
4	30777187	30777484	298	Yes	0
4	30804863	30805127	265	Yes	0
4	30952751	30952967	217	Yes	0
4	31374142	31374407	266	Yes	0
4	31568537	31568798	262	Yes	0
4	31736647	31736892	246	Yes	0
4	31806995	31807251	257	Yes	0
4	31828414	31828675	262	Yes	2
4	31961873	31962082	210	No	0
4	31971749	31971997	249	Yes	0
4	32015814	32016151	338	Yes	0
4	32022926	32023191	266	Yes	0
4	32040209	32040372	164	Yes	0
4	32131405	32131663	259	Yes	0
4	32164668	32164840	173	Yes	0
4	32430069	32430389	321	Yes	0
4	32584006	32584253	248	Yes	0
4	32653396	32653556	161	No	0
4	32657852	32658103	252	No	0
4	32836013	32836138	126	Yes	0
4	33043363	33043520	158	Yes	0
4	33108554	33108739	186	Yes	0
4	33137422	33137657	236	Yes	0
4	33200666	33200913	248	No	0
4	33372544	33372898	355	No	0
4	33375476	33375673	198	No	0
4	33386591	33386800	210	No	0
4	33387945	33388296	352	No	0
4	33389638	33389986	349	No	0
4	33402302	33402435	134	Yes	0
4	33410721	33410860	140	Yes	0
4	33664462	33664767	306	Yes	0
4	33678504	33678715	212	Yes	0
4	33838011	33838280	270	Yes	0
4	33920081	33920229	149	No	0
4	34025806	34026073	268	Yes	0
4	34070165	34070360	196	Yes	0
4	34218499	34218706	208	Yes	0
4	34296737	34296979	243	Yes	0
4	34414619	34414941	323	Yes	0
4	34519556	34519779	224	No	0
4	34704858	34705167	310	Yes	0
4	34786390	34786513	124	Yes	0
4	34786579	34786582	4	No	0
4	34858857	34859037	181	No	0
4	34926208	34926436	229	Yes	0
4	34949827	34950010	184	No	0
4	34995613	34995933	321	Yes	0
4	35090847	35091012	166	Yes	0
4	35098867	35099349	483	Yes	0
4	35195237	35195414	178	Yes	0
4	35196159	35196380	222	Yes	0
4	35256352	35256636	285	Yes	0
4	35407268	35407665	398	Yes	0
4	35414613	35414883	271	Yes	0
4	35511843	35512075	233	Yes	0
4	35612407	35612705	299	Yes	0
4	35668435	35669056	622	Yes	0
4	35670477	35670730	254	No	0
4	35765621	35765801	181	No	0
4	35778861	35779177	317	Yes	0
5	191413	191546	134	No	0
5	405329	405447	119	No	0
5	407104	407569	466	No	0
5	673158	673402	245	Yes	0
5	683577	683721	145	Yes	0
5	706589	706648	60	Yes	0
5	776362	776598	237	Yes	0
5	915319	915664	346	No	0
5	999253	999414	162	Yes	0
5	1077802	1078062	261	Yes	0
5	1103242	1103507	266	Yes	0
5	1136076	1136161	86	No	0
5	1250972	1251334	363	Yes	0
5	1304563	1304696	134	Yes	0
5	1454415	1454627	213	Yes	0
5	1457781	1457943	163	Yes	0
5	1564502	1564726	225	Yes	0
5	1580093	1580236	144	Yes	0
5	1613909	1614107	199	Yes	0
5	1632058	1632224	167	Yes	0
5	1636198	1636312	115	Yes	0
5	1645770	1646047	278	Yes	0
5	1698320	1698489	170	Yes	0
5	1904680	1904999	320	Yes	0
5	1923710	1924043	334	Yes	0
5	2104899	2105085	187	Yes	0
5	2118729	2118919	191	Yes	0
5	2171961	2172121	161	Yes	0
5	2185116	2185360	245	Yes	0
5	2321802	2322141	340	Yes	0
5	2323015	2323275	261	Yes	0
5	2471712	2471880	169	No	0
5	2607619	2607902	284	Yes	0
5	2904076	2904378	303	Yes	0
5	3013024	3013243	220	Yes	0
5	3083703	3083958	256	Yes	0
5	3197083	3197379	297	Yes	1
5	3281557	3281816	260	Yes	0
5	3302923	3303201	279	Yes	0
5	3472081	3472372	292	Yes	0
5	3669722	3669912	191	Yes	0
5	4139447	4139652	206	Yes	0
5	4175924	4176067	144	No	0
5	4293567	4293705	139	No	0
5	4474668	4474792	125	Yes	0
5	4487209	4487548	340	Yes	0
5	4602218	4602466	249	Yes	0
5	4665527	4665724	198	Yes	0
5	4735588	4735763	176	Yes	1
5	4777221	4777409	189	Yes	0
5	4870401	4870624	224	Yes	0
5	4928613	4928905	293	No	0
5	4999677	4999879	203	No	0
5	5021599	5021822	224	Yes	0
5	5167500	5167726	227	Yes	0
5	5209597	5209875	279	Yes	0
5	5310189	5310370	182	Yes	0
5	5353994	5354278	285	Yes	0
5	5490143	5490257	115	Yes	0
5	5621939	5622149	211	Yes	0
5	5628101	5628308	208	Yes	0
5	5719381	5719694	314	Yes	0
5	5790005	5790196	192	Yes	0
5	5796994	5797232	239	Yes	0
5	5927015	5927516	502	Yes	0
5	6005509	6005747	239	Yes	0
5	6084973	6085268	296	Yes	0
5	6087186	6087411	226	Yes	0
5	6158922	6159156	235	Yes	0
5	6696090	6696207	118	No	0
5	6744527	6744668	142	No	0
5	6778467	6778683	217	Yes	0
5	7031565	7031838	274	Yes	0
5	7031860	7032010	151	No	0
5	7285644	7285871	228	Yes	0
5	7811192	7811432	241	No	0
5	7877334	7877448	115	Yes	0
5	8113042	8113354	313	Yes	0
5	8222513	8222695	183	Yes	0
5	8451654	8451800	147	Yes	0
5	8498176	8498389	214	Yes	0
5	8535541	8535720	180	Yes	0
5	8733223	8733378	156	Yes	0
5	8794611	8794915	305	Yes	0
5	8829998	8830101	104	Yes	0
5	8863200	8863366	167	Yes	0
5	8966328	8966546	219	Yes	1
5	9158925	9159034	110	No	0
5	9876520	9876679	160	Yes	0
5	10593276	10593417	142	Yes	0
5	10610644	10610826	183	Yes	0
5	10995963	10996124	162	Yes	0
5	12132387	12132646	260	Yes	0
5	13012058	13012276	219	No	0
5	13397162	13397324	163	No	0
5	13737551	13737968	418	Yes	0
5	13952382	13952518	137	Yes	1
5	14011313	14011518	206	No	0
5	14064578	14064775	198	Yes	0
5	14076024	14076198	175	Yes	0
5	14311589	14311858	270	Yes	0
5	14341025	14341263	239	No	0
5	14342177	14342465	289	Yes	0
5	14342578	14342833	256	Yes	0
5	14481942	14482154	213	Yes	0
5	14501520	14501649	130	Yes	0
5	14680022	14680328	307	Yes	0
5	14734001	14734245	245	Yes	0
5	14976495	14976715	221	Yes	0
5	15019734	15020080	347	Yes	0
5	15096253	15096503	251	Yes	0
5	15118630	15118759	130	Yes	0
5	15156362	15156586	225	Yes	0
5	15590974	15591282	309	Yes	0
5	15789385	15789585	201	Yes	0
5	16182877	16183202	326	Yes	0
5	16237200	16237502	303	Yes	0
5	16294145	16294475	331	Yes	0
5	16329375	16329660	286	Yes	0
5	16335134	16335476	343	Yes	0
5	16348661	16348978	318	Yes	0
5	16393235	16393335	101	No	0
5	16814117	16814365	249	Yes	0
5	16892103	16892313	211	No	0
5	16956623	16956992	370	Yes	0
5	17541012	17541196	185	No	0
5	17578466	17578871	406	Yes	0
5	17651126	17651407	282	Yes	0
5	17726667	17727187	521	No	0
5	17736039	17736504	466	No	0
5	17778659	17778773	115	No	0
5	17996115	17996420	306	No	0
5	18096136	18096388	253	Yes	0
5	18115384	18115666	283	Yes	1
5	18144083	18144272	190	Yes	0
5	18198993	18199143	151	Yes	0
5	18593409	18593510	102	No	0
5	18933822	18934044	223	Yes	0
5	18943035	18943288	254	Yes	0
5	18976683	18976852	170	Yes	0
5	19017574	19017835	262	Yes	0
5	19083969	19084266	298	Yes	0
5	19093656	19093874	219	No	0
5	19260211	19260333	123	No	0
5	19290524	19290670	147	No	0
5	19473332	19473480	149	Yes	0
5	19591683	19591889	207	Yes	0
5	19596189	19596293	105	Yes	0
5	19754674	19754940	267	Yes	0
5	19929937	19930089	153	No	0
5	19980631	19980811	181	No	0
5	20081713	20081857	145	No	0
5	20641181	20641325	145	No	0
5	20648087	20648402	316	Yes	0
5	20661257	20661519	263	Yes	0
5	20713722	20713942	221	Yes	0
5	20735808	20736048	241	Yes	0
5	20822244	20822486	243	Yes	0
5	20830957	20831173	217	Yes	0
5	20845289	20845531	243	Yes	0
5	20960008	20960195	188	Yes	0
5	21112652	21112829	178	Yes	0
5	21198751	21198900	150	Yes	0
5	21556090	21556350	261	Yes	0
5	21583012	21583236	225	Yes	0
5	21679663	21679869	207	Yes	0
5	21715930	21716254	325	Yes	0
5	21753675	21753855	181	No	1
5	21754144	21754462	319	No	0
5	21999841	22000116	276	Yes	0
5	22123041	22123303	263	Yes	0
5	22143191	22143473	283	Yes	0
5	22165123	22165433	311	Yes	0
5	22172525	22172740	216	Yes	0
5	22466801	22467011	211	Yes	0
5	22522120	22522302	183	Yes	0
5	22553340	22553608	269	Yes	0
5	22574617	22574847	231	No	0
5	22585524	22585608	85	No	0
5	22613999	22614198	200	Yes	0
5	22686048	22686226	179	Yes	1
5	22899031	22899253	223	Yes	0
5	22909997	22910286	290	Yes	0
5	22921758	22922013	256	Yes	0
5	23003076	23003234	159	Yes	0
5	23107108	23107408	301	Yes	0
5	23193540	23193756	217	Yes	0
5	23198498	23198708	211	Yes	0
5	23252749	23252849	101	Yes	0
5	23259298	23259487	190	No	0
5	23326537	23326701	165	No	0
5	23335131	23335248	118	Yes	0
5	23342725	23342904	180	Yes	0
5	23422128	23422370	243	Yes	0
5	23430598	23430857	260	Yes	0
5	23433666	23433933	268	Yes	0
5	23443988	23444100	113	No	0
5	23459576	23459847	272	Yes	0
5	23555353	23555476	124	No	0
5	23569662	23569995	334	Yes	0
5	23638185	23638545	361	Yes	0
5	23643797	23643912	116	Yes	0
5	23708306	23708539	234	Yes	0
5	23714376	23714518	143	Yes	0
5	23781192	23781330	139	No	0
5	23798126	23798405	280	Yes	0
5	23832030	23832354	325	Yes	0
5	24124596	24124880	285	Yes	0
5	24207095	24207336	242	Yes	0
5	24270942	24271141	200	Yes	0
5	24307483	24307716	234	Yes	0
5	24315942	24316187	246	Yes	0
5	24372225	24372334	110	No	0
5	24372448	24372707	260	Yes	0
5	24380290	24380547	258	Yes	0
5	24466273	24466558	286	Yes	0
5	24526066	24526263	198	Yes	0
5	24529977	24530241	265	No	0
5	24531322	24531632	311	Yes	0
5	24752476	24752719	244	Yes	0
5	24879182	24879474	293	Yes	0
5	25093952	25094268	317	Yes	0
5	25178716	25178865	150	Yes	0
5	25311387	25311613	227	Yes	0
5	25468231	25468513	283	Yes	0
5	25473422	25473692	271	Yes	0
5	25538956	25539176	221	Yes	0
5	25582740	25582939	200	No	0
5	25593419	25593736	318	Yes	1
5	25711447	25711611	165	Yes	0
5	25737354	25737525	172	No	1
5	25789663	25789926	264	Yes	0
5	25863740	25863923	184	No	0
5	26063523	26063814	292	Yes	0
5	26123529	26123801	273	Yes	0
5	26124136	26124257	122	Yes	0
5	26306521	26306767	247	Yes	0
5	26389112	26389449	338	Yes	0
5	26460209	26460406	198	Yes	0
5	26476682	26476874	193	Yes	0
5	26657688	26658009	322	Yes	0
5	26713304	26713448	145	No	0
5	26772815	26773122	308	Yes	0
5	26915899	26916230	332	Yes	0
5	26921200	26921308	109	No	0
5	26967547	26967835	289	Yes	0
5	27067742	27067989	248	Yes	0
5	27091890	27092200	311	Yes	0
5	27120802	27121132	331	Yes	0
5	27234440	27234579	140	Yes	0
5	27235641	27235990	350	Yes	0
5	27351931	27352069	139	No	0
5	27427515	27427752	238	Yes	1
5	27478277	27478511	235	Yes	0
5	27573427	27573595	169	Yes	0
5	27578404	27578552	149	No	0
5	27601271	27601381	111	No	0
5	27644335	27644638	304	Yes	0
5	27645762	27646043	282	Yes	1
5	27680311	27680413	103	No	0
5	27681187	27681330	144	No	0
5	27778688	27778924	237	Yes	0
5	27790404	27790704	301	Yes	0
5	27795049	27795122	74	No	0
5	27823272	27823353	82	No	0
5	27975634	27975767	134	No	0
5	28000533	28000818	286	Yes	0
5	28171390	28171530	141	No	0
5	28181499	28181735	237	Yes	0
5	28181994	28182338	345	Yes	0
5	28183461	28183669	209	Yes	0
5	28183702	28183875	174	Yes	0
5	28186671	28187070	400	Yes	0
5	28233901	28234126	226	Yes	0
5	28250569	28250740	172	Yes	0
5	28269527	28269859	333	Yes	0
5	28292002	28292331	330	Yes	0
5	28385512	28385814	303	Yes	0
5	28449533	28449646	114	No	0
5	28500337	28500587	251	Yes	0
5	28585720	28585935	216	Yes	0
5	28588195	28588500	306	Yes	0
5	28682371	28682613	243	Yes	1
5	28727754	28727949	196	Yes	0
5	28783001	28783101	101	Yes	0
5	28827822	28828179	358	Yes	0
5	28899345	28899636	292	Yes	0
5	28931672	28931805	134	No	0
5	29261182	29261430	249	Yes	0
5	29441104	29441129	26	No	0
5	29442602	29442848	247	Yes	0
5	29461869	29462081	213	Yes	0
5	29481446	29481668	223	Yes	0
5	29548649	29548827	179	Yes	0
5	29584661	29584895	235	Yes	0
5	29657963	29658278	316	Yes	0
6	140793	141053	261	Yes	1
6	486110	486220	111	Yes	0
6	487988	488198	211	Yes	1
6	642289	642579	291	Yes	2
6	1094509	1094851	343	No	0
6	1138039	1138317	279	Yes	1
6	1154674	1154977	304	Yes	1
6	1280285	1280404	120	Yes	0
6	1283828	1283954	127	Yes	7
6	1400212	1400503	292	Yes	0
6	1433356	1433644	289	Yes	2
6	1451944	1452196	253	Yes	0
6	1467812	1468117	306	Yes	1
6	1516834	1517019	186	No	0
6	1687509	1687665	157	No	1
6	1747548	1747743	196	No	1
6	1760198	1760376	179	Yes	1
6	1761505	1761773	269	Yes	1
6	1785077	1785260	184	Yes	0
6	1912005	1912157	153	No	1
6	2073873	2074044	172	No	2
6	2202136	2202254	119	No	1
6	2240597	2240804	208	Yes	2
6	2242540	2242642	103	No	0
6	2383011	2383175	165	No	1
6	2384540	2384661	122	Yes	2
6	2472426	2472589	164	Yes	1
6	2586964	2587142	179	No	1
6	2629429	2629656	228	Yes	0
6	2812210	2812313	104	Yes	0
6	2862167	2862426	260	Yes	2
6	2897542	2897846	305	Yes	2
6	2957030	2957137	108	Yes	0
6	3076879	3076998	120	Yes	2
6	3092548	3092807	260	Yes	2
6	3130528	3130763	236	Yes	2
6	3140637	3140785	149	Yes	2
6	3311566	3311798	233	Yes	0
6	3337250	3337558	309	Yes	0
6	3454104	3454324	221	Yes	1
6	3584370	3584530	161	Yes	2
6	3594867	3595023	157	Yes	2
6	3651811	3651986	176	Yes	1
6	3662863	3663092	230	Yes	1
6	3677890	3678115	226	Yes	1
6	3681112	3681354	243	Yes	2
6	3830540	3830823	284	Yes	3
6	3868585	3868878	294	Yes	3
6	3951769	3952023	255	Yes	2
6	3971934	3972176	243	Yes	1
6	4003667	4003849	183	Yes	2
6	4286914	4287175	262	Yes	1
6	4330793	4330991	199	Yes	3
6	4344101	4344382	282	Yes	2
6	4672111	4672396	286	Yes	2
6	4714353	4714632	280	Yes	0
6	4715515	4715800	286	Yes	1
6	4806667	4806917	251	Yes	1
6	4881578	4881821	244	Yes	0
6	4919327	4919537	211	Yes	1
6	4939653	4939966	314	Yes	0
6	4954814	4955084	271	Yes	0
6	4989935	4990112	178	No	1
6	4996765	4996977	213	Yes	2
6	5098317	5098630	314	Yes	1
6	5099171	5099500	330	Yes	0
6	5117114	5117419	306	Yes	2
6	5152826	5153120	295	Yes	2
6	5172762	5172921	160	Yes	1
6	5374993	5375148	156	Yes	1
6	5551777	5552067	291	Yes	0
6	5584607	5584788	182	No	0
6	5612757	5612955	199	Yes	2
6	5805947	5806263	317	Yes	1
6	5812337	5812675	339	Yes	2
6	5885473	5885513	41	No	0
6	5895327	5895611	285	Yes	0
6	5905022	5905276	255	Yes	0
6	5918668	5918922	255	Yes	0
6	5919303	5919586	284	Yes	1
6	5941775	5942136	362	Yes	1
6	6206181	6206429	249	Yes	1
6	6255654	6255844	191	Yes	1
6	6290850	6290892	43	Yes	0
6	6356979	6357253	275	Yes	1
6	6393934	6394103	170	Yes	3
6	6529792	6529926	135	Yes	0
6	6918404	6918657	254	Yes	1
6	7291305	7291570	266	Yes	0
6	7540944	7541196	253	Yes	2
6	7671926	7672281	356	Yes	3
6	7683252	7683564	313	Yes	0
6	7923601	7923794	194	Yes	2
6	8278100	8278463	364	Yes	2
6	8300583	8300755	173	Yes	1
6	8356289	8356457	169	Yes	0
6	8467072	8467312	241	Yes	1
6	8980949	8981164	216	Yes	1
6	9135589	9135833	245	Yes	2
6	9211382	9211612	231	Yes	1
6	9392179	9392363	185	Yes	0
6	9393845	9394049	205	Yes	1
6	9445830	9446025	196	Yes	4
6	9912609	9912815	207	Yes	0
6	10035063	10035301	239	Yes	1
6	10116344	10116564	221	Yes	0
6	10137982	10138196	215	Yes	1
6	10175152	10175349	198	Yes	4
6	10740236	10740567	332	Yes	2
6	10950648	10950759	112	No	0
6	11107733	11108004	272	Yes	1
6	11356746	11356960	215	Yes	0
6	11418235	11418442	208	Yes	2
6	11457160	11457391	232	Yes	2
6	12254264	12254449	186	Yes	1
6	12439884	12440137	254	Yes	2
6	12500537	12500773	237	Yes	2
6	12579806	12579958	153	No	0
6	12616496	12616697	202	Yes	0
6	12659491	12659867	377	Yes	3
6	12671594	12671882	289	Yes	0
6	12688099	12688363	265	Yes	2
6	12860455	12860729	275	Yes	2
6	12862024	12862294	271	No	2
6	12942587	12942799	213	Yes	0
6	13002017	13002298	282	Yes	0
6	13041089	13041234	146	Yes	1
6	13391466	13391695	230	Yes	1
6	13508016	13508313	298	Yes	2
6	13633967	13634156	190	Yes	2
6	13954218	13954624	407	Yes	7
6	14186919	14187150	232	Yes	3
6	14257339	14257586	248	No	0
6	14460031	14460263	233	Yes	1
6	14498887	14499048	162	No	1
6	14537660	14537875	216	Yes	3
6	15130784	15131008	225	Yes	2
6	15274019	15274196	178	Yes	0
6	15438071	15438272	202	Yes	2
6	16465233	16465512	280	Yes	2
6	16915781	16916047	267	Yes	2
6	17117490	17117705	216	Yes	0
6	17220883	17221173	291	Yes	0
6	17234018	17234352	335	Yes	2
6	17396193	17396348	156	No	1
6	17536283	17536574	292	Yes	2
6	17983250	17983513	264	Yes	2
6	18095132	18095345	214	Yes	1
6	18231141	18231343	203	Yes	1
6	18245518	18245715	198	Yes	0
6	18699502	18699726	225	Yes	2
6	18711726	18711896	171	No	0
6	18747707	18748060	354	Yes	3
6	18798041	18798172	132	No	0
6	20152760	20153048	289	Yes	9
6	20185573	20185765	193	Yes	0
6	20189763	20190027	265	Yes	1
6	20272150	20272428	279	Yes	0
6	20286632	20286871	240	Yes	1
6	20528580	20528850	271	Yes	2
6	20970122	20970319	198	Yes	1
6	21138271	21138457	187	Yes	2
6	21746719	21747098	380	Yes	1
6	21751436	21751611	176	No	0
6	21811782	21812025	244	No	1
6	21817284	21817456	173	Yes	0
6	21838338	21838674	337	Yes	2
6	21921458	21921731	274	Yes	0
6	21996722	21996919	198	No	0
6	22039849	22040075	227	Yes	1
6	22064136	22064479	344	Yes	2
6	22429641	22429901	261	No	0
6	22636583	22636876	294	Yes	2
6	22637664	22637953	290	Yes	1
6	22701169	22701458	290	Yes	0
6	22713399	22713571	173	Yes	1
6	22759363	22759677	315	Yes	2
6	23196481	23196690	210	Yes	1
6	23473263	23473588	326	Yes	2
6	23475462	23475745	284	Yes	0
6	23779427	23779647	221	Yes	2
6	23784076	23784317	242	Yes	2
6	24081401	24081628	228	Yes	0
6	24120317	24120521	205	Yes	0
6	24447313	24447579	267	No	0
6	24450141	24450477	337	No	0
6	24468093	24468350	258	Yes	0
6	24581380	24581618	239	Yes	1
6	24617670	24617952	283	Yes	2
6	24704436	24704639	204	Yes	1
6	24838435	24838709	275	Yes	1
6	24914543	24914857	315	Yes	1
6	25201047	25201340	294	Yes	1
6	25257778	25258109	332	Yes	4
6	25305189	25305665	477	Yes	4
6	25408986	25409096	111	Yes	1
6	25409097	25409182	86	Yes	0
6	25569422	25569614	193	Yes	1
6	25718761	25718885	125	Yes	2
6	25815286	25815577	292	Yes	1
6	25940232	25940544	313	Yes	0
6	26222378	26222590	213	Yes	2
6	26559200	26559497	298	Yes	1
6	26618565	26618939	375	Yes	3
6	26622463	26622579	117	No	2
6	26661131	26661280	150	Yes	0
6	26742042	26742258	217	Yes	2
6	26744209	26744411	203	Yes	0
6	26780775	26781128	354	Yes	1
6	26792006	26792163	158	No	1
6	26794992	26795248	257	Yes	1
6	27064593	27064863	271	Yes	0
6	27346550	27346821	272	Yes	2
6	27462356	27462515	160	Yes	1
6	27481645	27481922	278	No	2
6	27526733	27527035	303	Yes	2
6	27550395	27550626	232	Yes	1
6	27670067	27670286	220	Yes	1
6	27695921	27696103	183	Yes	0
6	27727276	27727591	316	Yes	1
6	27754472	27754631	160	Yes	0
6	27766998	27767175	178	No	0
6	27897363	27897586	224	Yes	1
6	27927688	27927970	283	Yes	2
6	27973043	27973295	253	Yes	2
6	28146956	28147107	152	Yes	1
6	28148599	28148817	219	No	1
6	28249079	28249189	111	Yes	0
6	28472769	28473041	273	Yes	1
6	28579477	28579700	224	Yes	2
6	28685688	28685973	286	Yes	1
6	28911398	28911693	296	Yes	2
6	28914370	28914664	295	Yes	0
6	28922460	28922674	215	Yes	1
6	28985739	28985936	198	Yes	2
6	29343249	29343452	204	No	1
6	29360298	29360574	277	Yes	2
6	29365863	29366222	360	Yes	1
6	29370928	29371084	157	Yes	1
6	29529437	29529767	331	Yes	1
6	29634380	29634630	251	Yes	1
6	29651391	29651677	287	Yes	1
6	29831423	29831599	177	No	1
6	29951023	29951165	143	Yes	2
6	30012873	30013152	280	Yes	2
6	30026542	30026664	123	Yes	0
6	30234090	30234223	134	No	0
6	30265451	30265736	286	Yes	1
6	30367907	30368139	233	Yes	0
6	30528408	30528650	243	Yes	1
6	30543937	30544097	161	Yes	1
6	30950138	30950278	141	No	1
6	31229859	31230107	249	Yes	3
6	31252084	31252381	298	Yes	3
6	31382542	31382759	218	Yes	0
6	31453735	31454036	302	Yes	2
6	31487753	31487992	240	Yes	2
6	31554414	31554688	275	Yes	2
6	31569887	31570188	302	Yes	2
6	31771678	31771808	131	No	0
6	31976308	31976445	138	Yes	2
6	32077783	32078164	382	Yes	5
7	437015	437311	297	Yes	2
7	697927	698173	247	Yes	1
7	911759	911923	165	Yes	1
7	977118	977392	275	Yes	2
7	1525013	1525383	371	Yes	6
7	1541345	1541517	173	Yes	1
7	1626940	1627109	170	No	0
7	1747583	1747779	197	Yes	1
7	1748871	1749087	217	Yes	1
7	1817351	1817624	274	Yes	0
7	2112032	2112231	200	No	1
7	2135913	2136109	197	Yes	2
7	2282698	2282909	212	Yes	0
7	2638167	2638305	139	Yes	1
7	2703411	2703553	143	Yes	1
7	2900853	2901125	273	Yes	1
7	2912122	2912341	220	Yes	1
7	3212454	3212692	239	Yes	3
7	3273269	3273456	188	Yes	2
7	3335048	3335230	183	Yes	1
7	3606147	3606424	278	Yes	1
7	3700856	3700968	113	Yes	1
7	3716234	3716489	256	Yes	0
7	3791886	3792039	154	No	1
7	3946770	3946886	117	No	0
7	4076060	4076266	207	Yes	1
7	4298782	4299069	288	Yes	2
7	4333782	4333961	180	Yes	1
7	4375448	4375775	328	Yes	2
7	4453098	4453351	254	Yes	2
7	4556875	4557174	300	Yes	2
7	4560654	4560979	326	Yes	2
7	4596604	4596925	322	Yes	1
7	4608360	4608588	229	Yes	1
7	4728120	4728290	171	Yes	1
7	4731185	4731522	338	Yes	3
7	4766608	4766800	193	Yes	2
7	4830553	4830668	116	No	1
7	4853182	4853301	120	Yes	0
7	5045475	5045743	269	Yes	1
7	5135067	5135318	252	No	1
7	5201514	5201757	244	Yes	2
7	5204124	5204269	146	Yes	0
7	5498200	5498441	242	Yes	2
7	5560146	5560263	118	Yes	0
7	5569576	5569952	377	Yes	2
7	5670501	5670781	281	Yes	1
7	5892526	5892797	272	Yes	1
7	5982908	5983255	348	Yes	3
7	6061790	6061969	180	Yes	0
7	6322263	6322427	165	Yes	0
7	6459499	6459666	168	Yes	4
7	6944532	6944768	237	Yes	0
7	6995996	6996147	152	Yes	2
7	7001569	7001772	204	Yes	1
7	7160741	7160931	191	Yes	0
7	7171086	7171260	175	Yes	0
7	7190092	7190275	184	Yes	2
7	7348837	7349073	237	Yes	1
7	7417713	7417880	168	Yes	1
7	7426290	7426465	176	Yes	0
7	7694961	7695076	116	No	2
7	7932377	7932772	396	Yes	5
7	7989423	7989627	205	Yes	2
7	8142772	8142972	201	Yes	2
7	8248210	8248450	241	Yes	2
7	8370031	8370193	163	Yes	1
7	8527530	8527758	229	Yes	0
7	8984785	8985128	344	Yes	2
7	9156769	9156901	133	Yes	0
7	9381738	9382004	267	Yes	3
7	9550861	9551146	286	Yes	1
7	9574104	9574445	342	Yes	2
7	9586993	9587135	143	Yes	0
7	9594524	9594671	148	Yes	0
7	9714087	9714251	165	Yes	2
7	9721517	9721706	190	Yes	2
7	9736031	9736284	254	Yes	8
7	9759047	9759267	221	Yes	5
7	9879526	9879810	285	Yes	7
7	9925035	9925323	289	Yes	8
7	10062923	10063104	182	No	1
7	10526839	10527072	234	Yes	2
7	11518220	11518466	247	Yes	1
7	11528412	11528700	289	Yes	2
7	12112573	12112806	234	Yes	0
7	13201147	13201456	310	Yes	2
7	13463783	13463969	187	Yes	1
7	13487463	13487849	387	Yes	1
7	13508902	13509174	273	Yes	1
7	13586241	13586460	220	Yes	2
7	13627345	13627736	392	Yes	0
7	13654823	13654995	173	Yes	2
7	13983809	13984107	299	Yes	0
7	13999483	13999652	170	Yes	1
7	14058872	14059067	196	No	2
7	14101937	14102092	156	Yes	1
7	14194748	14194924	177	No	0
7	14794332	14794486	155	Yes	2
7	14892875	14893382	508	No	0
7	14898777	14899062	286	No	1
7	15323338	15323578	241	Yes	0
7	15838474	15838775	302	Yes	2
7	16016218	16016441	224	Yes	2
7	16566761	16566947	187	Yes	2
7	16795821	16796048	228	Yes	2
7	16905755	16905987	233	Yes	2
7	17984470	17984669	200	Yes	0
7	18064621	18064931	311	Yes	3
7	18184017	18184215	199	Yes	0
7	18254737	18254973	237	Yes	2
7	18376143	18376445	303	Yes	1
7	19703081	19703329	249	No	0
7	19720303	19720502	200	Yes	1
7	19848429	19848565	137	No	1
7	19850710	19850906	197	Yes	0
7	20032347	20032599	253	Yes	0
7	20075317	20075497	181	Yes	0
7	20116694	20116882	189	Yes	2
7	20328254	20328534	281	Yes	2
7	20454714	20454901	188	No	0
7	20542261	20542534	274	Yes	1
7	20549240	20549532	293	Yes	2
7	20598357	20598504	148	Yes	1
7	20865252	20865533	282	Yes	1
7	20980209	20980446	238	No	0
7	21021403	21021563	161	Yes	0
7	21174539	21174849	311	Yes	4
7	21203109	21203210	102	No	0
7	21262680	21263018	339	Yes	2
7	21354867	21355099	233	Yes	0
7	21611274	21611511	238	Yes	1
7	21695035	21695228	194	Yes	3
7	21764448	21764670	223	Yes	1
7	21817038	21817330	293	Yes	2
7	21924593	21924824	232	Yes	1
7	22032738	22033027	290	Yes	0
7	22096823	22096973	151	No	2
7	22116713	22116964	252	Yes	0
7	22180269	22180577	309	Yes	1
7	22182786	22182961	176	Yes	0
7	22251686	22251927	242	Yes	0
7	22263784	22264071	288	Yes	1
7	22274054	22274260	207	Yes	1
7	22296106	22296337	232	Yes	1
7	22502650	22502814	165	No	0
7	22514322	22514664	343	Yes	2
7	22553512	22553704	193	No	0
7	22596237	22596436	200	No	1
7	22705587	22705901	315	Yes	0
7	22828738	22828941	204	Yes	1
7	22890968	22891250	283	Yes	2
7	22896692	22896929	238	Yes	0
7	22934227	22934536	310	Yes	2
7	23018995	23019104	110	No	0
7	23068625	23068910	286	Yes	2
7	23070810	23071037	228	Yes	1
7	23080245	23080525	281	Yes	1
7	23189377	23189542	166	No	1
7	23205193	23205480	288	Yes	1
7	23205548	23205855	308	Yes	1
7	23286786	23287073	288	Yes	2
7	23287135	23287447	313	Yes	1
7	23435908	23436233	326	Yes	3
7	23556196	23556411	216	No	1
7	23579645	23579805	161	No	1
7	23660000	23660214	215	Yes	2
7	23717172	23717486	315	Yes	2
7	23937504	23937683	180	No	0
7	23962593	23962752	160	Yes	1
7	24038221	24038385	165	Yes	2
7	24063436	24063650	215	Yes	0
7	24077157	24077479	323	Yes	1
7	24230164	24230274	111	No	0
7	24319892	24320262	371	Yes	0
7	24337746	24338037	292	Yes	2
7	24455831	24456009	179	No	0
7	24466631	24466893	263	No	1
7	24604084	24604375	292	Yes	1
7	24652908	24653068	161	Yes	1
7	24698571	24698766	196	Yes	2
7	24747000	24747124	125	Yes	0
7	24812210	24812487	278	Yes	2
7	25015599	25015787	189	Yes	0
7	25017064	25017257	194	Yes	0
7	25145681	25145827	147	Yes	1
7	25229333	25229574	242	Yes	1
7	25348125	25348225	101	Yes	1
7	25379751	25379847	97	Yes	1
7	25468705	25469051	347	Yes	0
7	25492647	25492926	280	Yes	3
7	25498415	25498687	273	Yes	3
7	25597719	25597870	152	Yes	0
7	25598321	25598505	185	Yes	1
7	25945784	25946052	269	No	0
7	25983096	25983330	235	Yes	2
7	26105214	26105493	280	Yes	2
7	26259841	26260035	195	No	1
7	26300938	26301081	144	Yes	3
7	26366556	26366740	185	Yes	1
7	26369335	26369634	300	Yes	1
7	26390114	26390246	133	Yes	2
7	26429330	26429458	129	Yes	0
7	26469652	26469769	118	No	0
7	26603914	26604187	274	Yes	2
7	26664795	26664908	114	Yes	0
7	26796433	26796683	251	Yes	2
7	26848561	26848762	202	Yes	1
7	26850342	26850501	160	Yes	1
7	26913816	26914034	219	Yes	0
7	26916385	26916676	292	Yes	1
7	26946068	26946300	233	Yes	1
7	27022974	27023102	129	No	1
7	27042443	27042769	327	Yes	0
7	27056646	27056904	259	Yes	2
7	27125659	27125871	213	No	1
7	27210990	27211279	290	Yes	1
7	27420257	27420592	336	Yes	3
7	27573239	27573559	321	Yes	2
7	27822657	27822848	192	No	0
7	28125973	28126126	154	No	0
7	28280728	28280992	265	Yes	1
7	28402627	28402857	231	Yes	1
7	28403940	28404121	182	Yes	1
7	28408259	28408481	223	Yes	1
7	28428146	28428408	263	Yes	1
7	28501260	28501533	274	Yes	2
7	28510609	28510872	264	Yes	1
7	28541338	28541565	228	No	1
7	28556796	28557012	217	Yes	1
7	28655420	28655613	194	Yes	2
7	28710792	28711054	263	No	1
7	28817937	28818137	201	No	1
7	28897277	28897453	177	No	1
7	28936734	28936981	248	Yes	2
7	28967497	28967639	143	No	0
7	28982043	28982243	201	Yes	1
7	29042519	29042708	190	Yes	1
7	29289702	29289952	251	Yes	0
7	29362667	29362970	304	Yes	3
7	29401377	29401579	203	Yes	1
7	29402032	29402279	248	Yes	2
7	29454469	29454794	326	Yes	1
7	29621168	29621351	184	Yes	1
7	29645675	29645958	284	Yes	1
7	29648405	29648665	261	Yes	1
7	29716410	29716648	239	Yes	2
7	29786106	29786299	194	No	1
7	29787264	29787565	302	Yes	2
7	29861678	29861909	232	Yes	1
7	29882133	29882245	113	No	0
7	29920546	29920885	340	Yes	1
7	29930551	29930790	240	Yes	1
7	30045358	30045621	264	Yes	2
8	178585	178890	306	Yes	1
8	283970	284209	240	Yes	2
8	700729	700960	232	Yes	0
8	749868	750038	171	Yes	1
8	900103	900384	282	Yes	1
8	961350	961481	132	Yes	1
8	1085758	1085996	239	Yes	3
8	1524054	1524303	250	Yes	1
8	1540107	1540305	199	Yes	2
8	1553803	1553955	153	No	1
8	1714246	1714434	189	Yes	1
8	1966129	1966310	182	Yes	0
8	2404834	2405025	192	Yes	0
8	2593949	2594064	116	Yes	2
8	2805961	2806243	283	Yes	1
8	2858566	2858706	141	Yes	0
8	3170380	3170514	135	No	1
8	3232984	3233220	237	Yes	2
8	3241241	3241431	191	Yes	2
8	3352178	3352376	199	Yes	0
8	3357397	3357543	147	No	1
8	3374308	3374455	148	Yes	1
8	3457761	3457927	167	Yes	1
8	3463389	3463664	276	Yes	2
8	3819125	3819297	173	Yes	1
8	3959254	3959498	245	Yes	1
8	4002673	4002818	146	Yes	2
8	4037349	4037659	311	Yes	2
8	4064232	4064505	274	Yes	1
8	4313193	4313458	266	Yes	0
8	4505993	4506256	264	Yes	1
8	4507296	4507502	207	Yes	0
8	4509046	4509288	243	Yes	2
8	4509445	4509780	336	Yes	0
8	4662463	4662730	268	Yes	2
8	4725175	4725289	115	Yes	0
8	4782496	4782671	176	Yes	1
8	4805614	4805761	148	Yes	0
8	5009207	5009429	223	Yes	0
8	5035188	5035496	309	Yes	2
8	5129895	5129997	103	No	0
8	5133234	5133413	180	Yes	0
8	5273770	5273953	184	Yes	2
8	5404997	5405276	280	Yes	0
8	5431557	5431831	275	Yes	2
8	5591585	5591843	259	Yes	1
8	5988682	5988794	113	No	0
8	6157784	6158058	275	Yes	1
8	6192886	6193092	207	Yes	2
8	6263181	6263458	278	Yes	0
8	6764684	6764961	278	Yes	0
8	6837060	6837263	204	Yes	2
8	6883369	6883544	176	Yes	5
8	6954635	6954895	261	Yes	0
8	6958947	6959191	245	Yes	0
8	6963284	6963470	187	Yes	4
8	6969867	6970019	153	Yes	4
8	7070666	7070816	151	Yes	4
8	7358361	7358525	165	Yes	1
8	7384456	7384672	217	Yes	6
8	7462876	7463012	137	Yes	2
8	7464701	7464937	237	Yes	2
8	7565073	7565433	361	Yes	3
8	7597629	7597864	236	Yes	3
8	7702254	7702480	227	Yes	0
8	7778158	7778301	144	Yes	0
8	7953172	7953315	144	No	0
8	8007034	8007305	272	Yes	2
8	8017378	8017654	277	Yes	1
8	8262536	8262845	310	Yes	2
8	8361471	8361619	149	Yes	2
8	8499268	8499473	206	No	1
8	8713629	8714002	374	Yes	5
8	8717346	8717576	231	Yes	1
8	9032508	9032734	227	Yes	1
8	9086069	9086354	286	Yes	3
8	9091303	9091436	134	Yes	1
8	9096238	9096522	285	Yes	2
8	9244290	9244628	339	No	0
8	9269712	9270244	533	No	0
8	9272708	9273103	396	No	0
8	9285094	9285381	288	Yes	1
8	9294327	9294427	101	No	0
8	9456351	9456505	155	Yes	0
8	9508505	9508617	113	No	0
8	10083324	10083667	344	Yes	1
8	10096847	10097032	186	Yes	0
8	10137098	10137347	250	Yes	1
8	10522517	10522753	237	Yes	0
8	10595663	10595788	126	Yes	2
8	10678044	10678232	189	Yes	3
8	10690110	10690431	322	Yes	1
8	10732504	10732875	372	Yes	3
8	10773702	10773886	185	Yes	1
8	10812533	10812727	195	Yes	2
8	11026966	11027199	234	Yes	1
8	11072833	11073116	284	Yes	2
8	11490948	11491108	161	No	1
8	11500290	11500509	220	Yes	2
8	11608533	11608792	260	No	0
8	11811384	11811603	220	Yes	0
8	11957520	11957764	245	Yes	0
8	12077773	12078016	244	Yes	0
8	12283951	12284204	254	Yes	2
8	12451905	12452049	145	No	1
8	12517631	12517914	284	Yes	1
8	12967605	12967949	345	Yes	3
8	13152158	13152468	311	Yes	3
8	14007694	14007931	238	Yes	0
8	14105124	14105232	109	No	0
8	14784872	14785255	384	Yes	2
8	15015899	15016108	210	Yes	1
8	15026766	15026972	207	Yes	2
8	15441769	15442038	270	Yes	2
8	15574112	15574411	300	Yes	1
8	16408091	16408352	262	Yes	2
8	16979984	16980256	273	Yes	2
8	17405662	17405774	113	Yes	0
8	17604244	17604486	243	Yes	0
8	17774789	17775040	252	Yes	3
8	18080930	18081167	238	Yes	1
8	18168522	18168684	163	Yes	4
8	18260433	18260694	262	Yes	2
8	18296097	18296232	136	No	3
8	18303731	18304012	282	Yes	3
8	18598336	18598622	287	Yes	1
8	18632459	18632703	245	Yes	1
8	18695162	18695347	186	Yes	1
8	19125198	19125351	154	Yes	2
8	19300013	19300209	197	Yes	4
8	19408481	19408676	196	Yes	1
8	19431993	19432219	227	Yes	1
8	19525653	19525770	118	Yes	1
8	19575776	19576071	296	Yes	2
8	19857281	19857416	136	Yes	3
8	19891783	19892079	297	Yes	1
8	19978474	19978793	320	Yes	2
8	19995858	19996080	223	No	1
8	20198576	20198869	294	Yes	0
8	20229209	20229429	221	Yes	0
8	20547481	20547643	163	Yes	1
8	20660939	20661176	238	Yes	3
8	20794619	20794820	202	Yes	1
8	20812528	20812714	187	Yes	2
8	20916503	20916675	173	Yes	0
8	21323675	21323976	302	Yes	0
8	21409428	21409722	295	Yes	1
8	21421206	21421363	158	Yes	1
8	21674754	21674943	190	No	2
8	21815553	21815653	101	No	0
8	21843985	21844202	218	Yes	1
8	21971951	21972318	368	Yes	1
8	22043861	22044001	141	Yes	0
8	22189199	22189544	346	Yes	1
8	22208270	22208454	185	Yes	1
8	22209270	22209502	233	Yes	0
8	22248076	22248351	276	Yes	1
8	22268947	22269186	240	Yes	2
8	22452315	22452509	195	Yes	1
8	23167731	23167957	227	Yes	1
8	23202220	23202500	281	No	0
8	23441366	23441732	367	Yes	4
8	23676313	23676596	284	Yes	2
8	23735596	23735816	221	Yes	1
8	23791228	23791438	211	Yes	0
8	23802287	23802429	143	Yes	0
8	23895667	23895795	129	Yes	0
8	24029975	24030202	228	Yes	1
8	24164797	24165058	262	Yes	2
8	24227153	24227335	183	Yes	2
8	24299975	24300235	261	Yes	1
8	24309074	24309244	171	No	1
8	24349065	24349316	252	Yes	3
8	24671691	24671921	231	Yes	0
8	24693200	24693484	285	Yes	2
8	25299450	25299569	120	Yes	0
8	25316743	25317006	264	No	2
8	25415439	25415708	270	Yes	1
8	25597409	25597769	361	Yes	2
8	25892064	25892243	180	Yes	1
8	25941554	25941790	237	Yes	1
8	26249636	26249829	194	Yes	1
8	26477539	26477815	277	Yes	2
8	26489789	26489921	133	No	0
8	26584338	26584642	305	Yes	2
8	26810348	26810658	311	Yes	3
8	26836465	26836583	119	Yes	1
8	26881143	26881392	250	Yes	1
8	26889875	26890041	167	Yes	0
8	26996317	26996572	256	Yes	0
8	27023482	27023706	225	Yes	2
8	27148041	27148208	168	Yes	1
8	27560873	27561012	140	No	1
8	27561869	27562092	224	Yes	1
8	27722094	27722293	200	Yes	2
8	27788276	27788528	253	Yes	1
8	27867198	27867425	228	Yes	1
8	27920818	27921007	190	Yes	1
8	28014700	28014989	290	Yes	1
8	28137018	28137285	268	Yes	1
8	28296294	28296483	190	Yes	0
8	28415014	28415237	224	Yes	2
9	7124	7358	235	No	0
9	15093	15248	156	No	0
9	23025	23216	192	No	0
9	30972	31144	173	No	0
9	161702	161933	232	Yes	0
9	911936	912129	194	Yes	0
9	1336289	1336661	373	Yes	0
9	1340969	1341157	189	Yes	0
9	1492990	1493143	154	Yes	0
9	1523312	1523520	209	Yes	0
9	1529997	1530229	233	Yes	0
9	2036756	2036958	203	Yes	0
9	2284305	2284458	154	Yes	0
9	2493826	2494148	323	No	0
9	2494540	2494664	125	Yes	0
9	2593455	2593650	196	Yes	0
9	3854043	3854262	220	Yes	0
9	4573802	4574137	336	Yes	0
9	4612496	4612697	202	Yes	1
9	4868827	4869134	308	Yes	0
9	5294261	5294484	224	No	0
9	5296484	5296856	373	No	0
9	5309472	5309989	518	No	0
9	5314804	5315220	417	No	0
9	5316230	5316446	217	No	0
9	5322832	5323034	203	No	0
9	5325058	5325649	592	No	0
9	5342296	5342789	494	No	0
9	5815647	5815900	254	Yes	0
9	5824405	5824550	146	Yes	0
9	6478083	6478388	306	Yes	0
9	7590230	7590379	150	Yes	0
9	7592985	7593148	164	Yes	0
9	7633724	7633958	235	Yes	0
9	8051333	8051617	285	Yes	0
9	8061995	8062276	282	Yes	0
9	8213208	8213328	121	Yes	0
9	8253004	8253338	335	Yes	0
9	8523978	8524194	217	No	0
9	8834683	8834878	196	Yes	0
9	9230893	9231158	266	Yes	0
9	9601629	9601727	99	Yes	0
9	9705166	9705284	119	No	0
9	10232849	10232994	146	No	0
9	10413092	10413294	203	Yes	0
9	10597359	10597539	181	Yes	0
9	10943834	10944002	169	Yes	0
9	11139669	11139769	101	No	0
9	11163706	11163980	275	Yes	0
9	11305887	11306144	258	Yes	0
9	11619780	11619887	108	No	0
9	12442885	12443187	303	Yes	0
9	12535712	12535856	145	No	0
9	12561186	12561401	216	Yes	0
9	12694063	12694199	137	No	0
9	12706717	12707050	334	Yes	0
9	12778274	12778433	160	Yes	0
9	12873087	12873345	259	Yes	0
9	12928695	12928965	271	Yes	0
9	13230943	13231191	249	Yes	0
9	13268338	13268581	244	Yes	0
9	13330276	13330563	288	Yes	0
9	13339729	13339985	257	Yes	0
9	13486480	13486634	155	Yes	0
9	13818641	13818959	319	Yes	0
9	13856244	13856461	218	Yes	0
9	14092362	14092558	197	Yes	1
9	14112647	14112875	229	Yes	0
9	14261581	14261766	186	Yes	0
9	14343857	14343986	130	No	0
9	14578803	14578966	164	Yes	0
9	14720426	14720696	271	Yes	0
9	14723762	14723938	177	No	0
9	14859294	14859473	180	Yes	0
9	14866960	14867260	301	Yes	0
9	15066026	15066147	122	No	0
9	15096572	15096746	175	Yes	0
9	15163653	15163932	280	Yes	0
9	15170121	15170403	283	Yes	0
9	15278162	15278320	159	Yes	0
9	15361587	15361698	112	No	0
9	15561490	15561731	242	Yes	0
9	15595001	15595237	237	Yes	0
9	15607932	15608086	155	No	0
9	15683717	15684094	378	Yes	0
9	15687775	15687982	208	Yes	0
9	15696657	15697005	349	Yes	0
9	15700866	15701143	278	Yes	0
9	16136379	16136598	220	Yes	0
9	16145919	16146202	284	Yes	0
9	16292655	16292843	189	Yes	0
9	16594395	16594579	185	Yes	0
9	16625850	16626076	227	Yes	0
9	16948124	16948245	122	No	0
9	17051159	17051425	267	Yes	0
9	17058640	17058934	295	No	0
9	17164549	17164825	277	Yes	0
9	17462010	17462228	219	Yes	0
9	17617290	17617460	171	Yes	0
9	17642985	17643271	287	Yes	0
9	17702175	17702444	270	Yes	0
9	17713735	17713933	199	Yes	0
9	17787779	17788081	303	Yes	0
9	17798395	17798729	335	Yes	2
9	17850698	17850915	218	Yes	0
9	17952159	17952395	237	Yes	0
9	18011710	18012060	351	Yes	0
9	18060374	18060481	108	Yes	0
9	18061262	18061408	147	No	0
9	18082959	18083138	180	Yes	0
9	18140727	18140928	202	Yes	0
9	18245836	18245986	151	Yes	0
9	18359639	18359823	185	No	0
9	18574694	18575001	308	Yes	1
9	18632738	18632915	178	No	0
9	18743401	18743662	262	Yes	0
9	18838371	18838535	165	No	0
9	18863208	18863473	266	Yes	0
9	18864826	18864927	102	Yes	1
9	18951396	18951684	289	Yes	0
9	19052164	19052419	256	Yes	0
9	19133855	19134105	251	Yes	0
9	19154136	19154342	207	Yes	0
9	19161202	19161516	315	Yes	1
9	19268125	19268245	121	Yes	0
9	19382721	19383080	360	Yes	0
9	19387778	19387993	216	Yes	0
9	19392548	19392703	156	Yes	0
9	19411822	19412116	295	Yes	1
9	19413537	19413889	353	Yes	0
9	19420424	19420578	155	No	0
9	19461892	19462154	263	Yes	0
9	19661103	19661449	347	Yes	1
9	19683858	19684075	218	Yes	0
9	19742245	19742475	231	Yes	0
[truncated: 779 more rows]
